# Supplementary material for: A qualitative evaluation of general practitioners' perceptions regarding access to medicines in New Zealand
Source: PubMed Central journal article supplement — BMJ Open. 2012 Mar 28;2(2):e000518. doi: 10.1136/bmjopen-2011-000518 (PMC3317137; doi:10.1136/bmjopen-2011-000518), 2012-03-28
Supplement: bmjopen-2011-000518.draft_revisions.pdf [file bmjopen-2011-000518.draft_revisions.pdf]

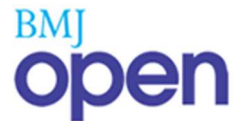

**A Qualitative Evaluation of General Practitioners' perceptions regarding access to medicines in New Zealand**

|                                 |                                                                                                                                                                                                                                                                                                                                                                                     |
|---------------------------------|-------------------------------------------------------------------------------------------------------------------------------------------------------------------------------------------------------------------------------------------------------------------------------------------------------------------------------------------------------------------------------------|
| Journal:                        | <i>BMJ Open</i>                                                                                                                                                                                                                                                                                                                                                                     |
| Manuscript ID:                  | bmjopen-2011-000518                                                                                                                                                                                                                                                                                                                                                                 |
| Article Type:                   | Research                                                                                                                                                                                                                                                                                                                                                                            |
| Date Submitted by the Author:   | 15-Nov-2011                                                                                                                                                                                                                                                                                                                                                                         |
| Complete List of Authors:       | Babar, Zaheer-Ud-Din; University of Auckland, School of Pharmacy, Faculty of Medical and Health Sciences<br>Grover, Piyush; Waikato Hospital, Pharmacy<br>Butler, Rachael; University of Auckland, Faculty of Medical and Health Sciences<br>Bye, Lynne; University of Auckland, Faculty of Medical and Health Sciences<br>sheridan, janie; Auckland University, School of Pharmacy |
| <b>Primary Subject Heading</b>: | Health policy                                                                                                                                                                                                                                                                                                                                                                       |
| Secondary Subject Heading:      | General practice & Family practice, Qualitative research, Health policy, Health services research, Public health                                                                                                                                                                                                                                                                    |
| Keywords:                       | Health policy < HEALTH SERVICES ADMINISTRATION & MANAGEMENT, Public health < INFECTIOUS DISEASES, PRIMARY CARE                                                                                                                                                                                                                                                                      |
|                                 |                                                                                                                                                                                                                                                                                                                                                                                     |

SCHOLARONE™  
Manuscripts

1  
2  
3 A Qualitative Evaluation of General Practitioners' perceptions regarding access to  
4 medicines in New Zealand  
5  
6

7 Babar ZU<sup>1</sup>, Grover P<sup>2</sup>, Butler R<sup>3</sup>, Bye L<sup>1</sup>, Sheridan J<sup>1</sup>  
8  
9

10 <sup>1</sup> School of Pharmacy, Faculty of Medical and Health Sciences University of  
11 Auckland, New Zealand  
12  
13

14  
15  
16 <sup>2</sup> Waikato Hospital, Hamilton, New Zealand  
17  
18

19 <sup>3</sup> School of Population Health, FMHS, University of Auckland, New Zealand  
20  
21  
22

### 23 **Address for Correspondence**

24  
25

26 Dr Zaheer Babar, School of Pharmacy, FMHS, University of Auckland, Private Mail  
27 Bag 92019, Auckland, New Zealand  
28

29 Email: [z.babar@auckland.ac.nz](mailto:z.babar@auckland.ac.nz)

30 Ph: +64 9 373 7599 Ext 88436  
31

32 Fax: +64 9 367 7192  
33  
34  
35  
36  
37  
38  
39  
40  
41  
42  
43  
44  
45  
46  
47  
48  
49  
50  
51  
52  
53  
54  
55  
56  
57  
58  
59  
60

## Article Summary

### Article Focus

- To evaluate GPs' perceptions regarding access to medicines in New Zealand
- To identify GPs' views and perceptions regarding the role of PHARMAC within the New Zealand healthcare system.

### Key Messages

- GPs were of the view that the current range of medicines available in New Zealand was reasonable, however it was acknowledged that there were some drugs that patients were missing out on.
- When considering the range of subsidised medicines available in New Zealand some GPs felt that there had been an improvement over recent years.
- It was highlighted that unexpected funding changes could create financial barriers for some patients, and that administrative procedures and other complexities created barriers in receiving a subsidy for restricted medicines.

### 1) Strengths and Limitations.

#### Strengths

- This is the first independent objective study covering GPs' perceptions regarding access to medicines issues in New Zealand.
- Findings from this study will form an essential component of any future research which reviews New Zealand's current medicines policy.
- It will also help in developing strategies to better inform patients' access to medicines, with GPs being a large group of health professionals likely to positively affect patient knowledge and views.

#### Limitations

- All GPs were working in a large metropolitan city in New Zealand – it is not known whether their views and experiences differ from colleagues working and living in small towns and rural locales.
- Also, only 19 out of 150 were interested in participating so this could be another source of bias in the study.

## ABSTRACT

**Objective**

The objective of this study was to evaluate general practitioners' (GPs') perceptions regarding access to medicines in New Zealand.

**Design** Qualitative

**Setting** Primary care

**Participants** GPs

**Main outcome measures**

GPs' views and perceptions

**Results**

GPs were of the view that the current range of medicines available in New Zealand was reasonable, however it was acknowledged that there were some drugs that patients were missing out on. When considering the range of subsidised medicines available in New Zealand some GPs felt that there had been an improvement over recent years. It was highlighted that unexpected funding changes could create financial barriers for some patients, and that administrative procedures and other complexities created barriers in receiving a subsidy for restricted medicines. GPs also reported problems with the availability and sole supply of certain medicines and claimed that switching from a branded medicine to its generic counterpart could be disruptive for patients.

**Conclusions**

The research concluded that although there were some issues with the availability of certain drugs, most GPs were satisfied with the broader access to medicines situation in New Zealand. This view is to contrary to the situation presented by the pharmaceutical industry. The issues around sole supply, the use of generic medicines and the administrative barriers regarding funding of medicines could be improved with better systems.

## INTRODUCTION

One of the aims of New Zealand's medicines policy is to ensure that New Zealanders have access to affordable medicines<sup>1</sup>. New Zealand has been successful in containing pharmaceutical costs, primarily via the policies of the Pharmaceutical Management Agency of New Zealand (PHARMAC)<sup>2</sup>. PHARMAC is the New Zealand Government agency that decides which medicines are subsidised. It was created in 1993 to ensure that New Zealanders get the best possible health outcomes from money the Government spends on medicines<sup>3</sup>. PHARMAC manages drug costs by applying pharmacoeconomic techniques when selecting medicines, and by promoting the use of generic medicines<sup>4,5</sup>. It uses a capped national medicines budget, along with a variety of contractual arrangements with companies that enables a company's medicine to be listed onto the schedule and therefore enables access to subsidies for consumers. These contractual arrangements include rebates on list prices from PHARMAC, tendering for off-patent drugs, and bundle agreements where PHARMAC may list expensive new drugs in its Pharmaceutical Schedule<sup>6</sup> in return for the manufacturer discounting the price of other products it supplies<sup>7</sup>. Most off-patent drugs listed in New Zealand's Pharmaceutical Schedule<sup>6</sup> are supplied from one supplier under contract to PHARMAC (sole supply) and large price discounts are provided in exchange for exclusivity<sup>7</sup>.

In community settings, only drugs on the Pharmaceutical Schedule receive government subsidy<sup>7</sup>. The government subsidy means that consumers who are New Zealand citizens or who have Permanent Residence make a co-payment (NZ\$3; US\$2.20 per prescription item) for each medicine listed in the Schedule. If the subsidy level PHARMAC has set for a particular medicines is less than the price charged by the drug company, then patients pay an additional fee, known as 'manufacturers surcharge'. For the medicines which are not listed on the schedule consumers are required to pay the full price.

With an annual drug budget expenditure for subsidised medicines used in the community setting of NZ\$599 million in 2007<sup>8</sup>, over 78% of all consumed medications are publicly funded in New Zealand. Although PHARMAC has played an important role in containing the pharmaceutical budget in New Zealand, in 2009 medicines expenditure was recorded as \$694 million a year and is expected to increase to 734 million NZ\$ by 2012<sup>9-11</sup>. Health care expenditure is a key concern for many countries and countries amend and form their policies on the basis of ongoing empirical research. General Practitioners (GPs) form a vital part in this research process because they are key stakeholders in the access to medicines process.

GPs are the main prescribers in New Zealand and prescribe over 44 million prescriptions annually<sup>12</sup>. They influence the "demand side" of the costs, and knowing what they think about "access to medicines" is important when exploring the impact of a country's medicines policy. Although very little independent research is available on GP views on access to medicines in New Zealand<sup>13</sup>, some research has been conducted by the pharmaceutical industry. One industry study of a sample of 528 GPs in New Zealand revealed GPs' dissatisfaction over the current system, and it was observed that a large majority (75%) of GPs supported a general review of PHARMAC<sup>14</sup>. It was also reported that GPs felt that PHARMAC was "too budget oriented" rather than patient focused, its decision-making "lacks transparency" and New Zealand's access to medicines "lags behind other comparable countries".

1  
2  
3 Furthermore, the study also found that 71% of clinicians rated New Zealanders'  
4 access to medicines as "poor" when compared with Australia<sup>14</sup>. PHARMAC has  
5 undertaken its own research<sup>15</sup> exploring health professionals' perceptions about how  
6 it functions (n=23), but only investigated PHARMAC's operational abilities and did  
7 not assess issues of access, availability and affordability of medicines<sup>13 16</sup>.

8  
9 Whilst the New Zealand Government promotes affordable medicines<sup>3,4</sup> the media has  
10 portrayed New Zealanders as having problems regarding accessing medicines<sup>17</sup>.  
11 Furthermore, it has been argued that "newer" and "more effective" medicines  
12 available abroad, such as risedronate, atomoxetine, galantamine and montelukast are  
13 not available in NZ<sup>17-19</sup>.

14  
15 Hence in this context, the current study was undertaken. The key aims of the study  
16 were to evaluate GPs' perceptions regarding access to medicines in New Zealand and  
17 to identify GPs' views and perceptions regarding the role of PHARMAC within the  
18 New Zealand healthcare system.  
19

## 20 21 **METHODS**

22  
23 A qualitative approach was adopted for the study, which was undertaken in Nov  
24 2008- Jan 2009 in Auckland, New Zealand. Auckland is New Zealand's largest city,  
25 with approximately 1.25 million people residing in the greater Auckland area (about  
26 one third of the population of the whole country<sup>20</sup>). The Auckland region is covered  
27 by three District Health Boards (DHBs), of which there are a total of 20 in New  
28 Zealand. DHBs are responsible for providing, or funding the provision of, health and  
29 disability services in their district<sup>21</sup>. A list of GPs practicing within the greater  
30 Auckland region was obtained from the Department of General Practice and Primary  
31 Health Care at the University of Auckland. GPs were stratified according to the DHB  
32 in which they were located (n=360 for Auckland DHB; n=393 for Counties Manukau  
33 DHB; n=482 for Waitemata DHB). Fifty GPs were randomly selected from each  
34 DHB list and were sent information regarding the study (n=150 in total). This  
35 included a participant information sheet which provided an overview of the research  
36 study and processes, and a research consent form (with a freepost envelope) that GPs  
37 could complete and return to the research team to indicate their interest in  
38 participating.  
39  
40

41  
42 A series of face-to-face, semi-structured interviews was undertaken. Questions were  
43 developed following a review of the relevant literature and to gather GPs' perceptions  
44 regarding access to medicines in New Zealand, and views and perceptions of the role  
45 of PHARMAC in relation to medicines access in New Zealand (a detailed list of the  
46 questions is attached in Table 1). Demographic information, including age, gender,  
47 practice type, and length of time practicing, was also recorded for each GP at the time  
48 of the interview. The interview guide was piloted with two health professionals prior  
49 to the fieldwork commencing, and further reviewed (and amended) following the  
50 completion of the first two interviews. Interviews took place at the GP's workplace.  
51 Seventeen interviews were conducted, at which stage data saturation was reached.  
52 Most were around 35 minutes in duration (range: 23-41 minutes), and all were audio-  
53 taped. GPs who took part in the study were offered a \$50 book voucher in recognition  
54 of their contribution to the research.  
55

56  
57 All interviews were transcribed verbatim with the full transcripts utilised in the  
58 subsequent analysis process. Analysis of the data was undertaken by the research  
59  
60

1  
2  
3 team via a staged process. In the first instance, transcripts were read and notes were  
4 taken regarding key themes and issues. Following this, a basic coding framework was  
5 developed, and interview data were coded, with the assistance of the NVIVO software  
6 programme. Lastly, a series of group analysis sessions involving the senior members  
7 of the research team were conducted, whereby further refinement of the themes was  
8 undertaken. Each 'quote' from within each theme was read by a member of the  
9 research team, and a brief interpretation of the quote written on a 'post-it' note. These  
10 were then placed on a board, and moved around into sub themes.  
11

12 Ethical approval for the study was gained from the University of Auckland Human  
13 Participants' Ethics Committee (Reference: 2008/445).  
14

## 15 16 17 **RESULTS**

18 A total of 19 GPs returned a research consent form and 17 of those were interviewed.  
19 Over half of participants (n=10) had been practicing as a GP for more than 20 years,  
20 and 13 were male. GPs were recruited from each of the DHBs, although the majority  
21 were based within Counties Manukau DHB (n=10). An overview of the demographic  
22 characteristics of the sample is provided in Table 2. Key findings from the research  
23 are presented below.  
24  
25  
26

### 27 **General perceptions of access to medicine in New Zealand**

28 When considering the range of (subsidised) medicines available in New Zealand,  
29 some GPs felt that there had been an improvement over recent years, and that – for  
30 the most part - sufficient drugs were subsidised and able to meet the needs of most  
31 patients.  
32

33 *95% I'm happy with what we have got. There are a small number of things*  
34 *which I would like more direct access to as a general practitioner. But I'm not*  
35 *aware of, and that may just be ignorance, of any major drugs or drug classes*  
36 *that we have zero access to. Most of the things that I'm aware of that are of*  
37 *any genuine value we have at least some access to. [GP3]*  
38

39 Some comments were made, however, about the range being fairly basic or limited –  
40 particularly in relation to there being few options available, in terms of the number of  
41 brands subsidised within certain classes of drugs. This included medicines such as  
42 statins and ACE inhibitors. While some GPs were accepting of this, particularly in  
43 light of the country's limited drug budget, other reported that it could become an issue  
44 in certain circumstances (e.g. where a specific medication was not effective for a  
45 patient):  
46  
47

48 *I would say that I have to struggle sometimes if one is not working. What can I*  
49 *do more to get it? What else can I try? So there are very limited options?*  
50 *[GP1]*  
51

52 One GP noted that whilst they felt the current range of medicines available in New  
53 Zealand was 'reasonable', they highlighted that it was likely there were some drugs  
54 that patients were missing out on. However, they also indicated that it was not always  
55 possible to know what these were:  
56  
57  
58  
59  
60

1  
2  
3 *For most GPs I think it is 30 drugs that cover 90% of your patients or*  
4 *something. So you kind of concentrate on those and the other ones you worry*  
5 *about but you don't actually worry about what you can't prescribe. [GP7]*  
6  
7

8 GPs were asked their views on the pharmaceutical industry's opinion that access to  
9 medicines is poor. There was limited agreement with this claim. Some GPs were  
10 dismissive of it, citing the self-serving nature of the statement and the fact that the  
11 pharmaceutical industry would have much to gain from promoting such a scenario:  
12

13 *Of course they would [say that]. They've got a vested interest ... I wouldn't*  
14 *listen to them [laughter]... A company has only got profit in mind, yeah. ...I*  
15 *mean they're playing a devil's advocate to PHARMAC so obviously they need*  
16 *to be there and they need to, they need to advertise their products to*  
17 *PHARMAC, but you know, they're only there for profit. [GP9]*  
18

19 Others reported that, whilst it may be an issue in relation to some medicines, it was  
20 not a widespread occurrence. One GP noted that, due to the restrictive nature of New  
21 Zealand's pharmaceutical market, drug companies could see limited opportunities for  
22 marketing and reimbursement for their products and were subsequently withdrawing.  
23 Whilst this was viewed as a potential problem, it was also seen to be inevitable given  
24 the small size of the country (and associated drug budget).  
25  
26  
27

### 28 **Affordability of medicines**

29 Patients in New Zealand are often required to pay a co-payment fee which ranges  
30 from 3 to 15 NZ\$ per item for subsidised medicines. However, from 1<sup>st</sup> Sep 2008<sup>22</sup>  
31 (shortly before the research was conducted) the eligibility criteria for the lower co-  
32 payment of 3 NZ\$ was expanded. In some cases, however, patients still have to pay  
33 up to a maximum pharmaceutical co-payment of \$15NZ\$ per item<sup>22</sup>. These are when  
34 the patients are not enrolled in a Primary Health Organisation<sup>a</sup> (PHO), if the  
35 prescription is from a private specialist (who is not part of the publicly funded  
36 system) or the patient does not have a Community Services Card or a Prescription  
37 Subsidy Card (PSC)<sup>b</sup>.  
38  
39

40 It was acknowledged by GPs who took part in the study that the widening of the  
41 3NZ\$ co-payment had improved access to medicines for patients, given the lower fee  
42 structure. In particular, GPs felt that the 3NZ\$ per item fee was at a level that most  
43 people would be able to afford, with some indicating that some level of fee was  
44 appropriate:  
45

46 *I think that by and large we have in New Zealand a good number of subsidised*  
47 *medications to use. So, the subsidy level such that the patients pay 3NZ\$ I*  
48 *think is appropriate. I think that's, you know, I think sometimes if a thing's*  
49  
50

51  
52 <sup>a</sup> Primary Health Organisations in New Zealand are health providers that are funded on a  
53 capitation basis by the New Zealand Government via District Health Boards.

54 <sup>b</sup> Community services card are issued for the patients with lower socioeconomic status while  
55 the PSC is for a family unit that has received 20 initial dispensing of single supplies of  
56 subsidised pharmaceuticals in the year commencing 1Feb to 31 Jan. People entitled for PSC  
57 are entitled for a reduce co-payment charges of 2NZ\$ per prescription item.<sup>22</sup> DHBNZ.  
58 Pharmacy Procedures Manual, 2010.  
59  
60



1  
2  
3 *made completely free it's wasted. Its value is degraded. So, and yet that's a*  
4 *fine line between that and preventing access. [GP12]*  
5  
6

7  
8 Some GPs, however, were of the view that cost remained a barrier to accessing  
9 medicines for some people. This included people not registered with a PHO, those on  
10 limited incomes (including teenagers and the elderly) and patients with an extensive  
11 medicine regime:

12 *I think the people who are on a large number of medications and I've got*  
13 *some here on 12 or 13 different pills..... Most of those people don't work, they*  
14 *are on a benefit so they are actually a little bit limited. Once they pay for 30*  
15 *items[sic- 20 items] then they are fine but that is still \$100 so for them, it is*  
16 *quite a cost or can become a cost. [GP7]*  
17  
18

19  
20 For some, the PHO enrolment system was seen as somewhat arbitrary, with one GP  
21 commenting that it was a 'ridiculous' system, as 'essentially everyone is either  
22 registered [with a PHO] or should be'. Other GPs, however, highlighted that the  
23 system encouraged patients to access their healthcare from one provider only, which  
24 was likely to have greater benefits than visiting a number of different general  
25 practices. Comments were also made regarding the complexity of the system,  
26 resulting in confusion for some patients:  
27

28 *Obviously encouraging patients to see their own doctor is a good thing, but*  
29 *there seems to be some inconsistencies between \$3 and \$15, whether they're*  
30 *funded or non-funded, enrolled or un-enrolled patient. You know, there's the*  
31 *question of waiting for three months before they become funded and enrolled*  
32 *and it becomes so, such confusion to patients. [GP8]*  
33  
34

35  
36 Affordability of non-subsidised medicines was discussed by GPs during interviews,  
37 with comments made about these being very expensive and only being accessible to  
38 the "rich". Particularly for those GPs working in lower socio-economic areas, the  
39 cost to the patient was a key consideration when deciding which medicines to  
40 prescribe:  
41

42 *I work in South Auckland at the moment and I'll be choosing subsidised*  
43 *medications and I know that, in the large majority, if it is non-subsidised*  
44 *medication it will be a significant financial strain for people. [GP4]*  
45

46 *Cost to a patient has a major influence on me. And in that I routinely*  
47 *prescribe generics and I tend to pre-warn people if something is going to cost*  
48 *an additional, or is not subsidised. Or sometimes ring the chemist to see*  
49 *what's cheaper and what it will cost. [GP3]*  
50  
51

## 52 **Changes regarding medicines subsidy and access to medicines**

53  
54 GPs talked about amendments in drug subsidy which could affect patients. This meant  
55 that prices sometimes fluctuated, with reports that the changing costs sometimes  
56 angered patients. As evident in the interview extract below, unexpected funding  
57  
58  
59  
60

1  
2  
3 changes could create financial barriers for some patients, and ultimately result in  
4 medicines not being accessed:

5  
6 *Those are snags that all of a sudden the rules change and you don't know*  
7 *about it and you have written a prescription for a child to have a medicine*  
8 *which normally would have been funded fully, no price whatsoever – and all*  
9 *of a sudden there is a change and now the parent goes to go and pick up*  
10 *[name of medicine] and now there is a partial charge to it. ...and the*  
11 *pharmacy calls me up in the middle of my next consultation and the parents*  
12 *have gone away because they couldn't afford the \$7 or whatever the part*  
13 *charge was. [GP6]*  
14

15  
16  
17 Another GP reported that keeping up to date with the subsidy changes was  
18 challenging, and also sometimes resulted in medication regimes needing to be  
19 amended:

20  
21 *I suppose my main comment would be about the things changing which cause*  
22 *us major problems having to rethink a medication regime that me may have*  
23 *just got really fine tuned. That's the major problem. The other major thing I*  
24 *suppose is keeping up with the continuous changes of what is subsidised and*  
25 *what isn't. [GP4]*  
26  
27

28 GPs reported that, for patients, the system was also confusing, particularly with regard  
29 to what medicines were funded and when (e.g. if accessed 'out of hours' higher  
30 charges are incurred). One research participant noted that informing patients about  
31 these issues sometimes dominated patient-GP discussions, at the expense of other  
32 important health-related issues.  
33

### 34 35 36 **Administrative issues**

37 Despite a general level of support expressed by GPs regarding the range and  
38 accessibility of subsidised medicines, the research identified perceptions of the New  
39 Zealand system as being somewhat 'complex'. GPs spoke about this being an issue  
40 both for themselves as health professionals – as well as for patients. Some GPs  
41 claimed that they did not always understand all the codes utilised (including 'section  
42 29'<sup>c</sup>), and that the eligibility criteria for subsidies were inconsistent. Research  
43 participants also spoke about the system being based on controlling costs rather than  
44 patient care, with examples provided of drugs that - at the time of the research - were  
45 unable to be prescribed by GPs (e.g. initially only specialist could prescribe  
46 Isotretinoin, however later on GPs were allowed to prescribe with subsidy from 1  
47 March 2009<sup>23</sup>). With no apparent clinical-related reasons for this, it was therefore  
48 assumed that these were budget-related decisions.  
49  
50

51  
52 GPs spoke about having to undertake 'a lot of paper work' in order to receive a  
53 subsidy for medicines which are not listed for subsidy on the Pharmaceutical  
54 Schedule. This mostly related to processes for medicines requiring Special Authority.  
55

56  
57 <sup>c</sup> Section 29 is law that permits an unregistered medicine in NZ to be procured  
58 and supplied to patients.  
59  
60

1  
2  
3 “Special Authority” means that the medicine is only eligible for subsidy for a  
4 particular person if an application meeting the criteria specified in the PHARMAC  
5 Schedule has been approved.<sup>20</sup> Once approved, the prescriber is provided with a  
6 Special Authority number which can provide access to subsidy for a specified  
7 medicine. Applications can be made electronically via the Internet, although a paper-  
8 based system was also still in operation at the time of the research. It should be noted  
9 that one research participant, at least, was still using the old system, and another  
10 reported that they did not have access to the electronic system at their practice. This  
11 process was felt to not only be time-consuming, and add to an already heavy  
12 workload, but also burdensome:  
13

14  
15 *We have a lot of medication in here, but then there's a lot of loopholes that we*  
16 *have to jump through to get those medications, you know, just like a lot of*  
17 *those special authority regulated medications... it creates so much more work*  
18 *for us before we can actually get the medication and so I guess a lot of those*  
19 *special authority medication if they can be available without special authority*  
20 *that would be quite good. [GP8]*  
21

22  
23 Having to reapply for Special Authority was also raised as an issue, particularly  
24 where medication was required for a long-term condition. Other comments made by  
25 research participants included the fact that “too many” medicines still required  
26 Special Authority approval (one GP noted that many of these were “freely available”  
27 overseas), and that the system and policy remained complex. Some GPs stated a  
28 desire for GPs to gain greater control of Special Authority medicines – in terms of  
29 being able to prescribe those that had been around for a longer period. It was also  
30 suggested that barriers in accessing Special Authority medicines should be removed  
31 for GPs who have been vocationally trained or who have special prescriber  
32 designation.  
33

34  
35 Despite some dissatisfaction with the system, it was acknowledged that the number of  
36 medicines requiring Special Authority had reduced over time. In addition, it was  
37 reported that the introduction of an electronic process for making applications had  
38 improved things considerably. There were also comments made about the protection  
39 that limited/restricted access affords GPs, in cases where patients are requesting a  
40 particular medicine that they do not feel comfortable prescribing (e.g.  
41 methylphenidate).  
42

43  
44 It was also acknowledged by GPs that a system that placed some restrictions on  
45 access to medicines was appropriate – and that patients should not have open access  
46 to any medicine they requested, nor that GPs should have the right to prescribe  
47 whatever they wanted, unrestricted. Findings from the research suggest that GPs  
48 considered the limitations appropriate, due to the need to improve rational use of  
49 medicines, to control costs, as well as safeguard against potential harm to patients:  
50

51 *I think that if their [special authority restrictions] aim is to reduce waste, I*  
52 *think sometimes an application and then a reapplication process is sensible,*  
53 *because many times I see in primary care a person's started on an agent and*  
54 *it's just continued without thought and conscious review of whether that*  
55 *agent's still needed and that can be an instance that causes harm [GP12]*  
56

57 *Well of course originally everything was totally free, and there was a much*  
58 *small, there was much smaller number of drugs provided back in the old days.*  
59  
60

1  
2  
3 *And there really were no cost incentives for patients to comply.... I think it's*  
4 *changed, it's a little bit more rational now in terms of that ...I think, there's*  
5 *probably for some people there probably is a price barrier whereas thirty*  
6 *years ago there were not, there was not. But again as I said I'm not unhappy*  
7 *having that signal there. [GP11]*  
8  
9

### 10 11 12 13 **Sole supply**

14  
15 As part of their cost containment system, PHARMAC issues requests for proposals  
16 from pharmaceutical companies to bid for the sole supply of specific medicines, with  
17 the contract awarded to the cheapest supplier<sup>9</sup>. Whilst the financial savings are a clear  
18 benefit of the sole supply system, negatives such as the risk of drug shortages due to a  
19 dependence on only one supplier were mentioned by GPs:

20  
21 *I think the sole supply thing from time to time has found to be wonky....I mean*  
22 *as soon as you have got sole supply you are heading for disaster because it is*  
23 *only one shipment away from either don't have any or something goes wrong*  
24 *like what happened with adrenaline....It seems like a crazy business model*  
25 *which has repeatedly failed in the past and I can't see why it is not going to*  
26 *fail in the future. [GP7]*  
27

28 As highlighted above, historical examples such as an adrenaline shortage in 2007, and  
29 other incidents such as problems with the supply of the flu vaccine were cited.  
30  
31

### 32 **Brand switching/generic medicines**

33  
34 In New Zealand PHARMAC manages the drug budget by negotiating with drug  
35 companies; competition between suppliers is also encouraged.<sup>6</sup> Switches from a  
36 branded medicine to a generic version (and between different brands as a means of  
37 cost-saving) are commonplace.<sup>20</sup> At the time of writing, the Pharmaceutical Schedule  
38 listed 2000 funded medicines, the majority of which are generics.<sup>20</sup>  
39

40 GPs reported that the switching from a branded medicine to its generic counterpart  
41 could be disruptive for patients. For example, issues such as the medicine being a  
42 different colour, or of a different name, could upset patients who sometimes needed  
43 added reassurance from their GP that the newly introduced medication was essentially  
44 the same medicine and would do the same job. It was also commented that patients  
45 sometimes viewed the replacement medicine as being inferior:  
46

47 *Each time the colour or something is changed, it is tough. Just recently I had a*  
48 *tough time explaining to a patient that it was the same medicine at the same*  
49 *strength and it just had a different colour. He still isn't convinced. I don't*  
50 *know what to do. [GP1]*  
51  
52

53  
54 Changes could be particularly disruptive for patients who were taking a wide range of  
55 medicines, and expressed frustration that GPs – as health professionals working at the  
56 'frontline' – were not consulted before changes were introduced:  
57  
58  
59  
60

1  
2  
3 *Every so often there is a major problem with the change of generic*  
4 *formulation. ... Those sorts of changes occur without sort of any face talk*  
5 *from us and they are to do with widely prescribed medications ..... I think if*  
6 *something is broadly prescribed then widespread changes are inadvisable*  
7 *without you know asking GPs' opinion about it because we often have the*  
8 *front line appreciation of how differences in medicines do affect patients*  
9 *differently. [GP4]*  
10

11  
12  
13 Another GP highlighted that a recent switch from a branded paracetamol to a generic  
14 formulation had created difficulties for some patients, and that reactions to a  
15 replacement for Ritalin<sup>TM</sup> had varied across different individuals:  
16

17 *I also don't agree with the information written in it saying that generics are as*  
18 *good as the original drugs. A lot of cases that has been proved not to be the*  
19 *case either in presentation, formulation. I mean the example would be the*  
20 *cheap Panadol<sup>TM</sup> [sic-paracetamol] they have got which dissolves before*  
21 *people can swallow. The problem with clogging of Salamol<sup>TM</sup> [salbutamol]*  
22 *pills [sic - inhaler]. The change in the effectiveness of Ritalin<sup>TM</sup> for example. I*  
23 *think it is about 40% of people reacted quite differently to it and to say that*  
24 *new drug is as good is absolute rubbish. So I think that's why I refuse to hand*  
25 *out PHARMAC's stuff. I just won't do it. [GP7]*  
26  
27  
28  
29

## 30 DISCUSSION

31  
32 This study set out to explore the views of GPs in relation to access to medicines in  
33 New Zealand. GPs were generally satisfied with the range of medicines available and  
34 noted that there had been a recent improvement, but raised some issues in relation to  
35 specific drug availability and a narrow range within some classes. There were  
36 concerns about financial barriers for some patients. In some respects, the findings  
37 from our research seem to be at odds with those in relation to pharmaceutical industry  
38 research on GP views, in which GPs seem to be generally not satisfied with the range  
39 of medicines available, in terms of meeting the needs of their patients<sup>13</sup> and also the  
40 industry point of viewpoint which claims issues with access<sup>17</sup>.  
41

42  
43 Whilst in this study the range of subsidised prescribed medicines available was broadly  
44 supported, GPs highlighted that the cost of prescriptions could act as a barrier for  
45 some patients. This is similar to another New Zealand study<sup>24</sup> which stated that out of  
46 a total of 18,320 respondents, 6.4% reported that they had deferred collecting a  
47 prescription at least once during the preceding 12 months because they could not  
48 afford the cost of collecting the prescription. Younger adults aged 15-24, females,  
49 smokers, Māori and Pacific patients, and those with the lowest income status, were  
50 more likely not to obtain or buy prescription drugs because of cost barriers<sup>24</sup>.  
51 However, it is important to note that since September 2008 the co-payment for  
52 prescribed medicines have been decreased from 15 NZ\$ to 3NZ\$ for many people. It  
53 was acknowledged by the GPs in this study that the widening of the 3NZ\$ co-  
54 payment had improved access to medicines for patients, given the affordability of the  
55 lower fee structure.  
56  
57  
58  
59  
60

1  
2  
3 Sole supply and the perceived risk of drug shortages were raised as an issue by GPs in  
4 this research. Other problems with sole supply have previously been reported,  
5 including the poor quality of slow release morphine and a brand of felodipine with  
6 questionable pharmacokinetics and bioequivalence<sup>25</sup>. In addition, the flu vaccine  
7 chosen for sole supply in 2005 was under-strength in one of the three component flu  
8 strains, and another company had to step in to supply the vaccine<sup>25</sup>. However,  
9 PHARMAC reiterates that reference pricing and sole supply occurs only where it is  
10 clear that a loss of choice between one equivalent brand of drug and another is not  
11 considered critical<sup>26</sup>. It has been suggested that it may be possible to manage some of  
12 the problems around sole supply through contingency and indemnity clauses in  
13 tendering contracts<sup>7</sup>.  
14  
15

16 The GPs in this study also discussed many administrative barriers regarding accessing  
17 medicines, including Special Authority, restrictions on prescribing certain medicines  
18 and a fair amount of paper work. However, since the research was conducted many of  
19 these administrative issues may have been solved by instituting a system of electronic  
20 Special Authority application<sup>27, 28</sup>. In addition, whilst issues were evident regarding  
21 Special Authority applications, it should be noted that, only a small proportion of  
22 people are taking medicines that require a Special Authority in order to access the  
23 subsidy for a specified medicine (for example it was found that less than 1% of  
24 patients require statin through special authority<sup>29, 30</sup>). Furthermore, many restrictions  
25 to medicines have clinical dimensions, and are not simply in place because of issues  
26 related to cost containment. For example, prior to March 2009, isotretinoin  
27 (Roaccutane®) was only available on “specialist only prescription medicines”<sup>31</sup>.  
28 Recently the specialist prescribing requirement was removed, however the decision  
29 has been criticised by the New Zealand Dermatological Society stating that  
30 Isotretinoin is prone to misuse.<sup>32</sup> Moreover, these restrictions are not something  
31 which are specific to the New Zealand scenario, and are quite common in Canada<sup>33</sup>,  
32 Australia<sup>34, 41</sup> and the United Kingdom<sup>35</sup>. Nevertheless, there remain issues around  
33 sole supply and administrative barriers regarding funding of medicines, which could  
34 be perhaps improved with better systems.  
35  
36  
37

38 Concerns were raised by research participants regarding brand switching, and with  
39 respect to generics, which were viewed by some GPs as being of lower quality.  
40 Similar findings were observed in a New Zealand report which evaluated  
41 stakeholders’ views regarding generic substitution. The report found that although  
42 PHARMAC and pharmacists agreed with generic substitution, physicians and  
43 opposed the proposal for voluntary generic substitution citing concerns which  
44 included reduced patient compliance, patient confusion and quality and  
45 bioavailability<sup>36</sup>. However, on the one hand, research indicates that most generic  
46 medicines provide the same quality, safety, and efficacy as the original brand name  
47 product, and are typically 20-90% less expensive than the brand name original<sup>37</sup>.  
48 Whilst generic medicines are associated with large cost reductions, findings from a  
49 study evaluating consumer perceptions in Auckland suggest that older patients and  
50 patients with chronic conditions needed more information about generic medicines.  
51 Less than half of survey participants viewed generic medicines “to be as safe,  
52 effective and equivalent in quality” than branded medication<sup>38</sup>. In addition, in a  
53 PHARMAC discussion, it was noted while the term “generic” is well understood by  
54 PHARMAC, the public may simply regard them as “cheap”<sup>39</sup>. Moreover, it has been  
55 shown the physician views can strongly influence those of their patients<sup>38-39</sup>. With  
56  
57  
58  
59  
60

1  
2  
3 Medicines New Zealand, the New Zealand's medicines policy promoting the use of  
4 generic drugs and stating that consideration must be given to 'cost-effective treatment  
5 options'<sup>1</sup>, it is vital that apart from assuring the quality of generic medicines,  
6 programmes that educate prescribers and patient about brand switching are required.  
7

### 8 9 10 **Limitations of the study**

11 All GPs were working in a large metropolitan city in New Zealand – it is not known  
12 whether their views and experiences differ from colleagues working and living in  
13 small towns and rural locales. Also, only 19 out of 150 were interested in  
14 participating so this could be another source of bias in the study.  
15

### 16 **CONCLUSION**

17 Whilst GPs in this study had some issues with the availability of certain drugs, they  
18 were generally satisfied with the access to medicines in New Zealand in primary care.  
19 The issues around sole supply, the use of generic medicines and the administrative  
20 barriers regarding funding of medicines could be improved with better systems.  
21 Findings from this study will form an essential component of any future research  
22 which reviews New Zealand's current medicines policy. It will also help in  
23 developing strategies to better inform patients' access to medicines, with GPs being a  
24 large group of health professionals likely to positively affect patient knowledge and  
25 views.  
26  
27  
28  
29

### 30 **Competing interest statement**

31 Piyush Grover was given a summer student scholarship by the University of Auckland to do initial  
32 work on the project. Lynne Bye and Rachael Butler worked as paid researcher from the grant received  
33 from New Zealand Pharmacy and Education and Research Foundation (NZPERF). Zaheer Babar and  
34 Janie Sheridan did not receive any personal funding or benefits from the grant. All authors have filled  
35 up competing interest forms ( and have declared competing interest, if there are any) and are available  
36 upon request.  
37

### 38 **An exclusive licence**

39 "the Corresponding Author has the right to grant on behalf of all authors and does grant on behalf of all  
40 authors, an exclusive licence (or non exclusive for government employees) on a worldwide basis to the  
41 BMJ Publishing Group Ltd and its Licensees to permit this article (if accepted) to be published in BMJ  
42 editions and any other BMJ PGL products and sublicences to exploit all subsidiary rights, as set out in  
43 our licence.  
44

### 45 **Authors' contribution**

46 ZB was the principal investigator and designed the study with the input from JS, LB, and PG. PG did  
47 the field study. PG and LB entered, checked and validated the data. The data was analysed by LB, PG,  
48 JS, ZB and RB. ZB and RB wrote the paper with significant contribution from JS. All authors  
49 participated in editing the article and approved the text for final submission.  
50

### 51 **Funding**

52 The funding was received from University of Auckland and New Zealand Pharmacy and Education and  
53 Research Foundation (NZPERF), however funders have no role in the design, analysis, interpretation  
54 of the project as well as writing of the article.  
55  
56  
57  
58  
59  
60

**Table 1: List of questions utilised in interviews with GPs**

|                                                                                                                                                                |                                                                                                                                |
|----------------------------------------------------------------------------------------------------------------------------------------------------------------|--------------------------------------------------------------------------------------------------------------------------------|
| <i>Domain 1 – General Practitioners’ perceptions regarding access to medicines and high cost drugs in New Zealand.</i>                                         |                                                                                                                                |
| A                                                                                                                                                              | What is your understanding of the “access to medicines” in New Zealand?                                                        |
| B                                                                                                                                                              | In your opinion what is the current state of access to medicines and high cost drugs in New Zealand and why?                   |
| C                                                                                                                                                              | If and how has this access changed in the past few years?                                                                      |
| D                                                                                                                                                              | What role do GPs play in determining the access to medicines in New Zealand?                                                   |
| E                                                                                                                                                              | How do you compare the access to medicines and high cost drugs in New Zealand with that of other developed countries?          |
| F                                                                                                                                                              | The current notion by drug industries is that access to medicines in New Zealand is inadequate. What is your opinion?          |
| G                                                                                                                                                              | Do you believe high costing medicines are readily accessible in New Zealand? Are there any examples you would like to mention? |
| H                                                                                                                                                              | Are there examples of medicines you would like to see being available in New Zealand?                                          |
| <i>Domain 2 - Views and perceptions regarding the role of Pharmac (Pharmaceutical Management Agency of New Zealand) to access of medicines in New Zealand.</i> |                                                                                                                                |
| A                                                                                                                                                              | What is your understanding of the role of Pharmac in New Zealand healthcare system?                                            |
| B                                                                                                                                                              | Do you think New Zealand needs an agency like Pharmac? Why?                                                                    |
| C                                                                                                                                                              | Pharmac has been under immense public scrutiny. Is it justified?                                                               |
| D                                                                                                                                                              | How successful has Pharmac been in achieving its aims?                                                                         |
| E                                                                                                                                                              | How does Pharmac influence the access to medicines for New Zealanders?                                                         |
| F                                                                                                                                                              | How do you find the decision making process undertaken by Pharmac?                                                             |
| G                                                                                                                                                              | Does Pharmac have sufficient representation from various health professionals and consumer groups?                             |
| H                                                                                                                                                              | What are your views on communication between Pharmac and GPs?                                                                  |



**Table 2: Overview of GP sample**

| N                                   | Number of participants (GPs) |
|-------------------------------------|------------------------------|
| <b>District Health Board (DHBs)</b> |                              |
| Auckland                            | 5                            |
| Counties Manukau                    | 10                           |
| Waitemata                           | 2                            |
| <b>Gender</b>                       |                              |
| Male                                | 13                           |
| Female                              | 4                            |
| <b>Age of participants (yrs)</b>    |                              |
| <40                                 | 4                            |
| 40 – 60                             | 10                           |
| 60 +                                | 3                            |
| <b>Experience (yrs)</b>             |                              |
| <10                                 | 3                            |
| 10 – 20                             | 4                            |
| 20 +                                | 10                           |

**REFERENCES**

1. Associate Minister of Health - Ministry of Health. Medicines New Zealand: Contributing to good health outcomes for all New Zealanders. Wellington: Ministry of Health, 2007.
2. Morgan s, Hanley G, McMahon M, Barer M. Influencing Drug Prices through Formulary-Based Policies: Lessons from New Zealand. *Healthcare Policy* 2007;3(1):121-40.
3. PHARMAC . Pharmacist Information Sheet: The Introduction to PHARMAC, Wellington, New Zealand, 2010.
4. Pharmaceutical Management Agency of New Zealand. The truth about generic medicines. Pharmacist info sheet. Wellington: PHARMAC, 2010.
5. Pharmaceutical Management Agency of New Zealand. Making funding decisions: Pharmacist info sheet. Wellington: PHARMAC, 2008.
6. Pharmaceutical Management Agency. Pharmaceutical Schedule. In: Agency PM, editor. Wellington: PHARMAC, 2011.
7. Morgan S, Boothe K. Prescription drug subsidies in Australia and New Zealand *Australian Prescriber* 2010;33:2-4.
8. Glover J, Hetzel D, Tennant S. Australia and New Zealand, health systems of international encyclopedia of public health. Oxford: Academic Press: 2008:255-67.
9. Ryall T. Health Minister confirms new medicines spending, 30<sup>th</sup> July 2009 <http://www.scoop.co.nz/stories/PA0907/S00395.htm> (Accessed 30<sup>th</sup> Sep 2011)
10. Pharmaceutical Management Agency. Pharmaceutical Management Agency Annual Review. Wellington: PHARMAC, 2007.
11. Gregory W. PHARMAC: Getting the Best Bang for Your Buck Since 1993. Presentation at School of Pharmacy, University of Auckland. 2010.
12. Ministry of Health. Health and Independence Report. Ministry of Health: Wellington, 2003
13. Babar Z. Scientific inquiry and pharmaceutical policy: A preliminary analysis from New Zealand. *National Medicines Symposium*. Canberra, Australia, 2008.
14. Pfizer New Zealand (UMR Research Limited). A Quantitative Study of Clinicians' views on Pharmacist: UMR Research Ltd, 2005.
15. PHARMAC. Pharmacist Stakeholder Research, . Wellington: PHARMAC, 2007.
16. Cumming J, Mays N, Daubé J. How New Zealand has contained expenditure on drugs. *BMJ* 2010;340.
17. French S. A thorn in Pharmacist's side. <http://www.stuff.co.nz/national/herceptin-debate/569569>, 2008.
18. Research Medicines Industry Institute. Access to medicines slow and long. Wellington: Research Medicines Industry Institute, 2008
19. Sundakov A. Funding High Cost targeted Medicines: Improving the New Zealand Approach: Australia Wyeth Pharmaceutical Position Paper. Wellington: Wyeth Pharmaceutical, 2008.
20. Auckland City Council. Auckland Council, 2011. <http://www.aucklandcity.govt.nz/> ( Accessed 30<sup>th</sup> Sep 2011)
21. Ministry of Health. District Health Boards. Wellington: Ministry of Health, 2010.
22. DHBNZ. Pharmacy Procedures Manual, 2010.
23. PHARMAC. Pharmaceutical Management Agency of New Zealand, Pharmaceutical Schedule 2009. Wellington, New Zealand

- 1
- 2
- 3 24. Jatrana S, Crampton P, Norris P. Ethnic differences in access to prescription
- 4 medication because of cost in New Zealand. *Journal of Epidemiology and*
- 5 *Community Health* 2011;65(5):454-60.
- 6
- 7 25. MacKay P. Is PHARMAC's sole-supply tendering policy harming the health of
- 8 New Zealanders? *New Zealand Medical Journal* 2005;118 (1214 ).
- 9
- 10 26. Davies A, Metcalfe S, Moodie P, McNea W. PHARMAC responds to Stewart
- 11 Mann on dihydropyridine calcium channel antagonists. *New Zealand Medical*
- 12 *Journal* 2005;118 (1220 ).
- 13
- 14 27. Ministry of Health. Sector Services. Claims, Provider Payments & Entitlements:
- 15 Special Authority. Wellington: Ministry of Health, 2008.
- 16
- 17 28. Pharmaceutical Management Agency. FAQ for GPs/Prescribers. Wellington:
- 18 PHARMAC, 2010.
- 19
- 20 29. Moodie P, Metcalfe S, McCormack P. Response from PHARMAC: difficult
- 21 choices. *New Zealand Medical Journal* 2003;116 (1170).
- 22
- 23 30. Pharmaceutical Management Agency. Difficult Choice. Wellington: PHARMAC,
- 24 2010
- 25
- 26 31. BPACNZ. Accessing funded medicines in New Zealand. *Best Practice Journal*
- 27 2009(21):43-45.
- 28
- 29 32. New Zealand Dermatological Society Incorporated. Dermatologists Warning Over
- 30 New Rules For Acne Drug - Media release December 20, 2008: New Zealand
- 31 Dermatological Society Incorporated, 2008.
- 32
- 33 33. Ministry of Health British Columbia. What is Special Authority . British
- 34 Columbia: Ministry of Health British Columbia,
- 35 <http://www.health.gov.bc.ca/pharmacare/sa/saindex.html> (Accessed 28/9/211)
- 36
- 37 34. Australian Government Department of Health and Ageing. Prescribing Medicines
- 38 – Information for PBS Prescribers. Canberra: Australian Government
- 39 Department of Health and Ageing, 2011.
- 40 <http://www.medicareaustralia.gov.au/provider/pbs/prescriber/index.jsp>
- 41
- 42 35. Prescribing restrictions placed on UK GPs. *PharmacoEconomics & Outcomes*
- 43 *News* 2011;627:2.
- 44
- 45 36. New Zealand Medicines and Medical Devices Safety Authority (Medsafe).
- 46 information for healthprofessionals. Regulatory issues. No immediate change to
- 47 generic. Wellington: Medsafe. [http://www.medsafe.govt.nz/profs/riss/gensubleg.](http://www.medsafe.govt.nz/profs/riss/gensubleg.asp#No)
- 48 [asp#No](http://www.medsafe.govt.nz/profs/riss/gensubleg.asp#No). Accessed 17 July 2011
- 49
- 50 37. European GenericMedicines Association. Generic medicines, basic notions.
- 51 Brussels: European GenericMedicines Association, 2002.
- 52
- 53 38. Babar Z-U-D, Stewart J, Reddy S, Alzaher W, Vareed P, Yacoub N, et al. An
- 54 evaluation of consumers' knowledge, perceptions and attitudes regarding
- 55 generic medicines in Auckland. *Pharmacy World & Science*
- 56 2010;32(4):440-48.
- 57
- 58 39. PHARMAC Consumer Advisory Committee. Minutes of the PHARMAC
- 59 Consumer Advisory Committee (CAC) meeting: Friday 13 July 2007.
- 60 Wellington: PHARMAC, 2007.

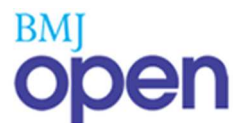

**A Qualitative Evaluation of General Practitioners' perceptions regarding access to medicines in New Zealand**

|                                 |                                                                                                                                                                                                                                                                                                                                                                                     |
|---------------------------------|-------------------------------------------------------------------------------------------------------------------------------------------------------------------------------------------------------------------------------------------------------------------------------------------------------------------------------------------------------------------------------------|
| Journal:                        | <i>BMJ Open</i>                                                                                                                                                                                                                                                                                                                                                                     |
| Manuscript ID:                  | bmjopen-2011-000518.R1                                                                                                                                                                                                                                                                                                                                                              |
| Article Type:                   | Research                                                                                                                                                                                                                                                                                                                                                                            |
| Date Submitted by the Author:   | 02-Feb-2012                                                                                                                                                                                                                                                                                                                                                                         |
| Complete List of Authors:       | Babar, Zaheer-Ud-Din; University of Auckland, School of Pharmacy, Faculty of Medical and Health Sciences<br>Grover, Piyush; Waikato Hospital, Pharmacy<br>Butler, Rachael; University of Auckland, Faculty of Medical and Health Sciences<br>Bye, Lynne; University of Auckland, Faculty of Medical and Health Sciences<br>sheridan, janie; Auckland University, School of Pharmacy |
| <b>Primary Subject Heading</b>: | Health policy                                                                                                                                                                                                                                                                                                                                                                       |
| Secondary Subject Heading:      | General practice & Family practice, Qualitative research, Health services research, Public health                                                                                                                                                                                                                                                                                   |
| Keywords:                       | Health policy < HEALTH SERVICES ADMINISTRATION & MANAGEMENT, Public health < INFECTIOUS DISEASES, PRIMARY CARE                                                                                                                                                                                                                                                                      |
|                                 |                                                                                                                                                                                                                                                                                                                                                                                     |

SCHOLARONE™  
Manuscripts

1  
2  
3 A Qualitative Evaluation of General Practitioners' perceptions regarding access to  
4 medicines in New Zealand  
5  
6

7 Babar ZU<sup>1</sup>, Grover P<sup>2</sup>, Butler R<sup>3</sup>, Bye L<sup>1</sup>, Sheridan J<sup>1</sup>  
8  
9

10 <sup>1</sup> School of Pharmacy, Faculty of Medical and Health Sciences University of  
11 Auckland, New Zealand  
12  
13

14  
15  
16 <sup>2</sup> Waikato Hospital, Hamilton, New Zealand  
17  
18

19 <sup>3</sup> School of Population Health, FMHS, University of Auckland, New Zealand  
20  
21  
22

### 23 **Address for Correspondence**

24  
25

26 Dr Zaheer Babar, School of Pharmacy, FMHS, University of Auckland, Private Mail  
27 Bag 92019, Auckland, New Zealand  
28

29 Email: [z.babar@auckland.ac.nz](mailto:z.babar@auckland.ac.nz)

30 Ph: +64 9 373 7599 Ext 88436  
31

32 Fax: +64 9 367 7192  
33  
34  
35  
36  
37  
38  
39  
40  
41  
42  
43  
44  
45  
46  
47  
48  
49  
50  
51  
52  
53  
54  
55  
56  
57  
58  
59  
60

## Article Summary

### Article Focus

- To evaluate GPs' perceptions regarding access to medicines in New Zealand
- To identify GPs' views and perceptions regarding the role of PHARMAC within the New Zealand healthcare system.

### Key Messages

- GPs were of the view that the current range of medicines available in New Zealand was reasonable, however it was acknowledged that there were some drugs that patients were missing out on.
- When considering the range of subsidised medicines available in New Zealand some GPs felt that there had been an improvement over recent years.
- It was highlighted that unexpected funding changes could create financial barriers for some patients, and that administrative procedures and other complexities created barriers in receiving a subsidy for restricted medicines.

### 1) Strengths and Limitations.

#### Strengths

- This is the first independent objective study covering GPs' perceptions regarding access to medicines issues in New Zealand.
- Findings from this study will form an essential component of any future research which reviews New Zealand's current medicines policy.
- It will also help in developing strategies to better inform patients' access to medicines, with GPs being a large group of health professionals likely to positively affect patient knowledge and views.

#### Limitations

- All GPs were working in a large metropolitan city in New Zealand – it is not known whether their views and experiences differ from colleagues working and living in small towns and rural locales.
- Also, only 19 out of 150 were interested in participating so this could be another source of bias in the study.

## ABSTRACT

**Objective**

The objective of this study was to evaluate general practitioners' (GPs') perceptions regarding access to medicines in New Zealand.

**Design** Qualitative

**Setting** Primary care

**Participants** GPs

**Main outcome measures**

GPs' views and perceptions

**Results**

GPs were of the view that the current range of medicines available in New Zealand was reasonable, however it was acknowledged that there were some drugs that patients were missing out on. When considering the range of subsidised medicines available in New Zealand some GPs felt that there had been an improvement over recent years. It was highlighted that unexpected funding changes could create financial barriers for some patients, and that administrative procedures and other complexities created barriers in receiving a subsidy for restricted medicines. GPs also reported problems with the availability and sole supply of certain medicines and claimed that switching from a branded medicine to its generic counterpart could be disruptive for patients.

**Conclusions**

The research concluded that although there were some issues with the availability of certain drugs, most GPs were satisfied with the broader access to medicines situation in New Zealand. This view is to contrary to the situation presented by the pharmaceutical industry. The issues around sole supply, the use of generic medicines and the administrative barriers regarding funding of medicines could be improved with better systems. The current work provides a solid account of what GPs see as the advantages and disadvantages of the current system and how they balance these demands in practice.

## INTRODUCTION

One of the aims of New Zealand's medicines policy is to ensure that New Zealanders have access to affordable medicines<sup>1</sup>. New Zealand has been successful in containing pharmaceutical costs, primarily via the policies of the Pharmaceutical Management Agency of New Zealand (PHARMAC)<sup>2</sup>. PHARMAC is the New Zealand Government agency that decides which medicines are subsidised. It was created in 1993 to ensure that New Zealanders get the best possible health outcomes from money the Government spends on medicines<sup>3</sup>. PHARMAC manages drug costs by applying pharmacoeconomic techniques when selecting medicines, and by promoting the use of generic medicines<sup>4,5</sup>. It uses a capped national medicines budget, along with a variety of contractual arrangements with pharmaceutical companies that enables a company's medicine to be listed onto the schedule and therefore enables access to subsidies for consumers. These contractual arrangements include rebates on list prices from PHARMAC, tendering for off-patent drugs, and bundle agreements where PHARMAC may list expensive new drugs in its Pharmaceutical Schedule<sup>6</sup> in return for the manufacturer discounting the price of other products it supplies<sup>7</sup>. Most off-patent drugs listed in New Zealand's Pharmaceutical Schedule<sup>6</sup> are supplied from one supplier under contract to PHARMAC (sole supply) and large price discounts are provided in exchange for exclusivity<sup>7</sup>.

In community settings, only drugs on the Pharmaceutical Schedule receive government subsidy<sup>7</sup>. The government subsidy means that consumers who are New Zealand citizens or who have Permanent Residence make a co-payment (NZ\$3; US\$2.20 per prescription item) for each medicine listed in the Schedule. If the subsidy level PHARMAC has set for a particular medicines is less than the price charged by the drug company, then patients pay an additional fee, known as 'manufacturers surcharge'. For the medicines which are not listed on the schedule consumers are required to pay the full price.

With an annual drug budget expenditure for subsidised medicines used in the community setting of NZ\$599 million in 2007<sup>8</sup>, over 78% of all consumed medications are publicly funded in New Zealand. Although PHARMAC has played an important role in containing the pharmaceutical budget in New Zealand, in 2009 medicines expenditure was recorded as \$694 million a year and is expected to increase to 734 million NZ\$ by 2012<sup>9-11</sup>. Health care expenditure is a key concern for many countries and countries amend and form their policies on the basis of ongoing empirical research. General Practitioners (GPs) form a vital part in this research process because they are key stakeholders in the access to medicines process.

GPs are the main prescribers in New Zealand and prescribe over 44 million prescriptions annually<sup>12</sup>. They influence the "demand side" of the costs, and knowing what they think about "access to medicines" is important when exploring the impact of a country's medicines policy. Although very little independent research is available on GP views on access to medicines in New Zealand<sup>13</sup>, some research has been conducted by the pharmaceutical industry. One industry study of a sample of 528 GPs in New Zealand revealed GPs' dissatisfaction over the current system, and it was observed that a large majority (75%) of GPs supported a general review of PHARMAC<sup>14</sup>. It was also reported that GPs felt that PHARMAC was "too budget oriented" rather than patient focused, its decision-making "lacks transparency" and New Zealand's access to medicines "lags behind other comparable countries". Furthermore, the study also found that 71% of clinicians rated New Zealanders'



1  
2  
3 access to medicines as “poor” when compared with Australia<sup>14</sup>. PHARMAC has  
4 undertaken its own research<sup>15</sup> exploring health professionals’ perceptions about how  
5 it functions (n=23), but only investigated PHARMAC’s operational abilities and did  
6 not assess issues of access, availability and affordability of medicines<sup>13 16</sup>.

7  
8 Whilst the New Zealand Government promotes affordable medicines<sup>3,4</sup> the media has  
9 portrayed New Zealanders as having problems regarding accessing medicines<sup>17</sup>.  
10 Furthermore, it has been argued that “newer” and “more effective” medicines  
11 available abroad, such as risedronate, atomoxetine, galantamine and montelukast are  
12 not available in NZ<sup>17-19</sup>.

13  
14 Hence in this context, the current study was undertaken. The key aims of the study  
15 were to evaluate GPs’ perceptions regarding access to medicines in New Zealand and  
16 to identify GPs’ views and perceptions regarding the role of PHARMAC within the  
17 New Zealand healthcare system.  
18

## 19 20 21 **METHODS**

22 A qualitative approach was adopted for the study, which was undertaken in Nov  
23 2008- Jan 2009 in Auckland, New Zealand. Auckland is New Zealand's largest city,  
24 with approximately 1.25 million people residing in the greater Auckland area (about  
25 one third of the population of the whole country<sup>20</sup>). The Auckland region is covered  
26 by three District Health Boards (DHBs), of which there are a total of 20 in New  
27 Zealand. DHBs are responsible for providing, or funding the provision of, health and  
28 disability services in their district<sup>21</sup>. A list of GPs practicing within the greater  
29 Auckland region was obtained from the Department of General Practice and Primary  
30 Health Care at the University of Auckland. GPs were stratified according to the DHB  
31 in which they were located (n=360 for Auckland DHB; n=393 for Counties Manukau  
32 DHB; n=482 for Waitemata DHB). Fifty GPs were randomly selected from each  
33 DHB list and were sent information regarding the study (n=150 in total). This  
34 included a participant information sheet which provided an overview of the research  
35 study and processes, and a research consent form (with a freepost envelope) that GPs  
36 could complete and return to the research team to indicate their interest in  
37 participating.  
38  
39

40 A series of face-to-face, semi-structured interviews was undertaken. Questions were  
41 developed following a review of the relevant literature and to gather GPs’ perceptions  
42 regarding access to medicines in New Zealand, and views and perceptions of the role  
43 of PHARMAC in relation to medicines access in New Zealand (a detailed list of the  
44 questions is attached in Table 1). Demographic information, including age, gender,  
45 practice type, and length of time practicing, was also recorded for each GP at the time  
46 of the interview. The interview guide was piloted with two health professionals prior  
47 to the fieldwork commencing, and further reviewed (and amended) following the  
48 completion of the first two interviews. Interviews took place at the GP’s workplace.  
49 Seventeen interviews were conducted, at which stage data saturation was reached.  
50 Most were around 35 minutes in duration (range: 23-41 minutes), and all were audio-  
51 taped. GPs who took part in the study were offered a \$50 book voucher in recognition  
52 of their contribution to the research.  
53  
54

55 All interviews were transcribed verbatim with the full transcripts utilised in the  
56 subsequent analysis process. Analysis of the data was undertaken by the research  
57 team via a staged process. In the first instance, transcripts were read and notes were  
58  
59  
60

1  
2  
3 taken regarding key themes and issues. Following this, a basic coding framework was  
4 developed, and interview data were coded, with the assistance of the NVIVO software  
5 programme. Lastly, a series of group analysis sessions involving the senior members  
6 of the research team were conducted, whereby further refinement of the themes was  
7 undertaken. Each 'quote' from within each theme was read by a member of the  
8 research team, and a brief interpretation of the quote written on a 'post-it' note. These  
9 were then placed on a board, and moved around into sub themes.  
10

11 Ethical approval for the study was gained from the University of Auckland Human  
12 Participants' Ethics Committee (Reference: 2008/445).  
13

## 14 15 16 **RESULTS**

17 A total of 19 GPs returned a research consent form and 17 of those were interviewed.  
18 Over half of participants (n=10) had been practicing as a GP for more than 20 years,  
19 and 13 were male. GPs were recruited from each of the DHBs, although the majority  
20 were based within Counties Manukau DHB (n=10). An overview of the demographic  
21 characteristics of the sample is provided in Table 2. Key findings from the research  
22 are presented below.  
23

### 24 25 26 **General perceptions of access to medicine in New Zealand**

27 When considering the range of (subsidised) medicines available in New Zealand,  
28 some GPs felt that there had been an improvement over recent years, and that – for  
29 the most part - sufficient drugs were subsidised and able to meet the needs of most  
30 patients.  
31

32 *95% I'm happy with what we have got. There are a small number of things*  
33 *which I would like more direct access to as a general practitioner. But I'm not*  
34 *aware of, and that may just be ignorance, of any major drugs or drug classes*  
35 *that we have zero access to. Most of the things that I'm aware of that are of*  
36 *any genuine value we have at least some access to. [GP3]*  
37

38 Some comments were made, however, about the range being fairly basic or limited –  
39 particularly in relation to there being few options available, in terms of the number of  
40 brands subsidised within certain classes of drugs. This included medicines such as  
41 statins and ACE inhibitors. While some GPs were accepting of this, particularly in  
42 light of the country's limited drug budget, other reported that it could become an issue  
43 in certain circumstances (e.g. where a specific medication was not effective for a  
44 patient):  
45

46 *I would say that I have to struggle sometimes if one is not working. What can I*  
47 *do more to get it? What else can I try? So there are very limited options?*  
48 *[GP1]*  
49

50 One GP noted that whilst they felt the current range of medicines available in New  
51 Zealand was 'reasonable', they highlighted that it was likely there were some drugs  
52 that patients were missing out on. However, they also indicated that it was not always  
53 possible to know what these were:  
54

55 *For most GPs I think it is 30 drugs that cover 90% of your patients or*  
56 *something. So you kind of concentrate on those and the other ones you worry*  
57 *about but you don't actually worry about what you can't prescribe. [GP7]*  
58  
59  
60

1  
2  
3  
4  
5  
6  
7  
8  
9  
10  
11  
12  
13  
14  
15  
16  
17  
18  
19  
20  
21  
22  
23  
24  
25  
26  
27  
28  
29  
30  
31  
32  
33  
34  
35  
36  
37  
38  
39  
40  
41  
42  
43  
44  
45  
46  
47  
48  
49  
50  
51  
52  
53  
54  
55  
56  
57  
58  
59  
60

GPs were asked their views on the pharmaceutical industry's opinion that access to medicines is poor. There was limited agreement with this claim. Some GPs were dismissive of it, citing the self-serving nature of the statement and the fact that the pharmaceutical industry would have much to gain from promoting such a scenario:

*Of course they would [say that]. They've got a vested interest ... I wouldn't listen to them [laughter]... A company has only got profit in mind, yeah. ...I mean they're playing a devil's advocate to PHARMAC so obviously they need to be there and they need to, they need to advertise their products to PHARMAC, but you know, they're only there for profit. [GP9]*

Others reported that, whilst it may be an issue in relation to some medicines, it was not a widespread occurrence. One GP noted that, due to the restrictive nature of New Zealand's pharmaceutical market, drug companies could see limited opportunities for marketing and reimbursement for their products and were subsequently withdrawing. Whilst this was viewed as a potential problem, it was also seen to be inevitable given the small size of the country (and associated drug budget).

### Affordability of medicines

Patients in New Zealand are often required to pay a co-payment fee which ranges from 3 to 15 NZ\$ per item for subsidised medicines. However, from 1<sup>st</sup> Sep 2008<sup>22</sup> (shortly before the research was conducted) the eligibility criteria for the lower co-payment of 3 NZ\$ was expanded. In some cases, however, patients still have to pay up to a maximum pharmaceutical co-payment of \$15NZ\$ per item<sup>22</sup>. These are when the patients are not enrolled in a Primary Health Organisation<sup>a</sup> (PHO), if the prescription is from a private specialist (who is not part of the publicly funded system) or the patient does not have a Community Services Card or a Prescription Subsidy Card (PSC)<sup>b</sup>.

It was acknowledged by GPs who took part in the study that the widening of the 3NZ\$ co-payment had improved access to medicines for patients, given the lower fee structure. In particular, GPs felt that the 3NZ\$ per item fee was at a level that most people would be able to afford, with some indicating that some level of fee was appropriate:

*I think that by and large we have in New Zealand a good number of subsidised medications to use. So, the subsidy level such that the patients pay 3NZ\$ I think is appropriate. I think that's, you know, I think sometimes if a thing's made completely free it's wasted. Its value is degraded. So, and yet that's a fine line between that and preventing access. [GP12]*

---

<sup>a</sup> Primary Health Organisations in New Zealand are health providers that are funded on a capitation basis by the New Zealand Government via District Health Boards.

<sup>b</sup> Community services card are issued for the patients with lower socioeconomic status while the PSC is for a family unit that has received 20 initial dispensing of single supplies of subsidised pharmaceuticals in the year commencing 1Feb to 31 Jan. People entitled for PSC are entitled for a reduce co-payment charges of 2NZ\$ per prescription item.<sup>22</sup> DHBNZ. Pharmacy Procedures Manual, 2010.

1  
2  
3 Some GPs, however, were of the view that cost remained a barrier to accessing  
4 medicines for some people. This included people not registered with a PHO, those on  
5 limited incomes (including teenagers and the elderly) and patients with an extensive  
6 medicine regime:  
7

8 *I think the people who are on a large number of medications and I've got*  
9 *some here on 12 or 13 different pills..... Most of those people don't work, they*  
10 *are on a benefit so they are actually a little bit limited. Once they pay for 30*  
11 *items[sic- 20 items] then they are fine but that is still \$100 so for them, it is*  
12 *quite a cost or can become a cost. [GP7]*  
13

14  
15 For some, the PHO enrolment system was seen as somewhat arbitrary, with one GP  
16 commenting that it was a 'ridiculous' system, as 'essentially everyone is either  
17 registered [with a PHO] or should be'. Other GPs, however, highlighted that the  
18 system encouraged patients to access their healthcare from one provider only, which  
19 was likely to have greater benefits than visiting a number of different general  
20 practices. Comments were also made regarding the complexity of the system,  
21 resulting in confusion for some patients:  
22

23  
24 *Obviously encouraging patients to see their own doctor is a good thing, but*  
25 *there seems to be some inconsistencies between \$3 and \$15, whether they're*  
26 *funded or non-funded, enrolled or un-enrolled patient. You know, there's the*  
27 *question of waiting for three months before they become funded and enrolled*  
28 *and it becomes so, such confusion to patients. [GP8]*  
29

30  
31 Affordability of non-subsidised medicines was discussed by GPs during interviews,  
32 with comments made about these being very expensive and only being accessible to  
33 the "rich". Particularly for those GPs working in lower socio-economic areas, the  
34 cost to the patient was a key consideration when deciding which medicines to  
35 prescribe:  
36

37  
38 *I work in South Auckland at the moment and I'll be choosing subsidised*  
39 *medications and I know that, in the large majority, if it is non-subsidised*  
40 *medication it will be a significant financial strain for people. [GP4]*  
41

42 *Cost to a patient has a major influence on me. And in that I routinely*  
43 *prescribe generics and I tend to pre-warn people if something is going to cost*  
44 *an additional, or is not subsidised. Or sometimes ring the chemist to see*  
45 *what's cheaper and what it will cost. [GP3]*  
46

### 47 **Changes regarding medicines subsidy and access to medicines**

48  
49 GPs talked about amendments in drug subsidy which could affect patients. This meant  
50 that prices sometimes fluctuated, with reports that the changing costs sometimes  
51 angered patients. As evident in the interview extract below, unexpected funding  
52 changes could create financial barriers for some patients, and ultimately result in  
53 medicines not being accessed:  
54

55 *Those are snags that all of a sudden the rules change and you don't know*  
56 *about it and you have written a prescription for a child to have a medicine*  
57 *which normally would have been funded fully, no price whatsoever – and all*  
58  
59  
60

1  
2  
3 *of a sudden there is a change and now the parent goes to go and pick up*  
4 *[name of medicine] and now there is a partial charge to it. ...and the*  
5 *pharmacy calls me up in the middle of my next consultation and the parents*  
6 *have gone away because they couldn't afford the \$7 or whatever the part*  
7 *charge was. [GP6]*  
8  
9

10  
11 Another GP reported that keeping up to date with the subsidy changes was  
12 challenging, and also sometimes resulted in medication regimes needing to be  
13 amended:

14 *I suppose my main comment would be about the things changing which cause*  
15 *us major problems having to rethink a medication regime that me may have*  
16 *just got really fine tuned. That's the major problem. The other major thing I*  
17 *suppose is keeping up with the continuous changes of what is subsidised and*  
18 *what isn't. [GP4]*  
19  
20

21  
22 GPs reported that, for patients, the system was also confusing, particularly with regard  
23 to what medicines were funded and when (e.g. if accessed 'out of hours' higher  
24 charges are incurred). One research participant noted that informing patients about  
25 these issues sometimes dominated patient-GP discussions, at the expense of other  
26 important health-related issues.  
27  
28

### 29 30 **Administrative issues**

31 Despite a general level of support expressed by GPs regarding the range and  
32 accessibility of subsidised medicines, the research identified perceptions of the New  
33 Zealand system as being somewhat 'complex'. GPs spoke about this being an issue  
34 both for themselves as health professionals – as well as for patients. Some GPs  
35 claimed that they did not always understand all the codes utilised (including 'section  
36 29'<sup>c</sup>), and that the eligibility criteria for subsidies were inconsistent. Research  
37 participants also spoke about the system being based on controlling costs rather than  
38 patient care, with examples provided of drugs that - at the time of the research - were  
39 unable to be prescribed by GPs (e.g. initially only specialist could prescribe  
40 Isotretinoin, however later on GPs were allowed to prescribe with subsidy from 1  
41 March 2009<sup>23</sup>). With no apparent clinical-related reasons for this, it was therefore  
42 assumed that these were budget-related decisions.  
43  
44

45  
46 GPs spoke about having to undertake 'a lot of paper work' in order to receive a  
47 subsidy for medicines which are not listed for subsidy on the Pharmaceutical  
48 Schedule. This mostly related to processes for medicines requiring Special Authority.  
49 "Special Authority" means that the medicine is only eligible for subsidy for a  
50 particular person if an application meeting the criteria specified in the PHARMAC  
51 Schedule has been approved.<sup>20</sup> Once approved, the prescriber is provided with a  
52 Special Authority number which can provide access to subsidy for a specified  
53 medicine. Applications can be made electronically via the Internet, although a paper-  
54  
55

56  
57 <sup>c</sup> Section 29 is law that permits an unregistered medicine in NZ to be procured and supplied to  
58 patients.  
59  
60

1  
2  
3 based system was also still in operation at the time of the research. It should be noted  
4 that one research participant, at least, was still using the old system, and another  
5 reported that they did not have access to the electronic system at their practice. This  
6 process was felt to not only be time-consuming, and add to an already heavy  
7 workload, but also burdensome:  
8

9 *We have a lot of medication in here, but then there's a lot of loopholes that we*  
10 *have to jump through to get those medications, you know, just like a lot of*  
11 *those special authority regulated medications... it creates so much more work*  
12 *for us before we can actually get the medication and so I guess a lot of those*  
13 *special authority medication if they can be available without special authority*  
14 *that would be quite good. [GP8]*  
15  
16

17  
18 Having to reapply for Special Authority was also raised as an issue, particularly  
19 where medication was required for a long-term condition. Other comments made by  
20 research participants included the fact that “too many” medicines still required  
21 Special Authority approval (one GP noted that many of these were “freely available”  
22 overseas), and that the system and policy remained complex. Some GPs stated a  
23 desire for GPs to gain greater control of Special Authority medicines – in terms of  
24 being able to prescribe those that had been around for a longer period. It was also  
25 suggested that barriers in accessing Special Authority medicines should be removed  
26 for GPs who have been vocationally trained or who have special prescriber  
27 designation.  
28

29 Despite some dissatisfaction with the system, it was acknowledged that the number of  
30 medicines requiring Special Authority had reduced over time. In addition, it was  
31 reported that the introduction of an electronic process for making applications had  
32 improved things considerably. There were also comments made about the protection  
33 that limited/restricted access affords GPs, in cases where patients are requesting a  
34 particular medicine that they do not feel comfortable prescribing (e.g.  
35 methylphenidate).  
36

37 It was also acknowledged by GPs that a system that placed some restrictions on  
38 access to medicines was appropriate – and that patients should not have open access  
39 to any medicine they requested, nor that GPs should have the right to prescribe  
40 whatever they wanted, unrestricted. Findings from the research suggest that GPs  
41 considered the limitations appropriate, due to the need to improve rational use of  
42 medicines, to control costs, as well as safeguard against potential harm to patients:  
43  
44

45 *I think that if their [special authority restrictions] aim is to reduce waste, I*  
46 *think sometimes an application and then a reapplication process is sensible,*  
47 *because many times I see in primary care a person's started on an agent and*  
48 *it's just continued without thought and conscious review of whether that*  
49 *agent's still needed and that can be an instance that causes harm [GP12]*  
50

51 *Well of course originally everything was totally free, and there was a much*  
52 *small, there was much smaller number of drugs provided back in the old days.*  
53 *And there really were no cost incentives for patients to comply.... I think it's*  
54 *changed, it's a little bit more rational now in terms of that ...I think, there's*  
55 *probably for some people there probably is a price barrier whereas thirty*  
56 *years ago there were not, there was not. But again as I said I'm not unhappy*  
57 *having that signal there. [GP11]*  
58  
59  
60

### Sole supply

As part of their cost containment system, PHARMAC issues requests for proposals from pharmaceutical companies to bid for the sole supply of specific medicines, with the contract awarded to the cheapest supplier<sup>9</sup>. Whilst the financial savings are a clear benefit of the sole supply system, negatives such as the risk of drug shortages due to a dependence on only one supplier were mentioned by GPs:

*I think the sole supply thing from time to time has found to be wonky....I mean as soon as you have got sole supply you are heading for disaster because it is only one shipment away from either don't have any or something goes wrong like what happened with adrenaline....It seems like a crazy business model which has repeatedly failed in the past and I can't see why it is not going to fail in the future. [GP7]*

As highlighted above, historical examples such as an adrenaline shortage in 2007, and other incidents such as problems with the supply of the flu vaccine were cited.

### Brand switching/generic medicines

In New Zealand PHARMAC manages the drug budget by negotiating with drug companies; competition between suppliers is also encouraged.<sup>6</sup> Switches from a branded medicine to a generic version (and between different brands as a means of cost-saving) are commonplace.<sup>20</sup> At the time of writing, the Pharmaceutical Schedule listed 2000 funded medicines, the majority of which are generics.<sup>20</sup>

GPs reported that the switching from a branded medicine to its generic counterpart could be disruptive for patients. For example, issues such as the medicine being a different colour, or of a different name, could upset patients who sometimes needed added reassurance from their GP that the newly introduced medication was essentially the same medicine and would do the same job. It was also commented that patients sometimes viewed the replacement medicine as being inferior:

*Each time the colour or something is changed, it is tough. Just recently I had a tough time explaining to a patient that it was the same medicine at the same strength and it just had a different colour. He still isn't convinced. I don't know what to do. [GP1]*

Changes could be particularly disruptive for patients who were taking a wide range of medicines, and expressed frustration that GPs – as health professionals working at the 'frontline' – were not consulted before changes were introduced:

*Every so often there is a major problem with the change of generic formulation. ... Those sorts of changes occur without sort of any face talk from us and they are to do with widely prescribed medications ..... I think if something is broadly prescribed then widespread changes are inadvisable without you know asking GPs' opinion about it because we often have the front line appreciation of how differences in medicines do affect patients differently. [GP4]*

1  
2  
3 Another GP highlighted that a recent switch from a branded paracetamol to a generic  
4 formulation had created difficulties for some patients, and that reactions to a  
5 replacement for Ritalin™ had varied across different individuals:  
6

7 *I also don't agree with the information written in it saying that generics are as*  
8 *good as the original drugs. A lot of cases that has been proved not to be the*  
9 *case either in presentation, formulation. I mean the example would be the*  
10 *cheap Panadol™ [sic-paracetamol] they have got which dissolves before*  
11 *people can swallow. The problem with clogging of Salamol™ [salbutamol]*  
12 *pills [sic - inhaler]. The change in the effectiveness of Ritalin™ for example. I*  
13 *think it is about 40% of people reacted quite differently to it and to say that*  
14 *new drug is as good is absolute rubbish. So I think that's why I refuse to hand*  
15 *out PHARMAC's stuff. I just won't do it. [GP7]*  
16

## 17 18 19 20 **DISCUSSION**

21  
22 This study set out to explore the views of GPs in relation to access to medicines in  
23 New Zealand. GPs were generally satisfied with the range of medicines available and  
24 noted that there had been a recent improvement, but raised some issues in relation to  
25 specific drug availability and a narrow range within some classes. There were  
26 concerns about financial barriers for some patients. In some respects, the findings  
27 from our research seem to be at odds with those in relation to pharmaceutical industry  
28 research on GP views, in which GPs seem to be generally not satisfied with the range  
29 of medicines available, in terms of meeting the needs of their patients<sup>13</sup> and also the  
30 industry point of viewpoint which claims issues with access<sup>17</sup>.  
31

32 Whilst in this study the range of subsidised prescribed medicines available was broadly  
33 supported, GPs highlighted that the cost of prescriptions could act as a barrier for  
34 some patients. This is similar to another New Zealand study<sup>24</sup> which stated that out of  
35 a total of 18,320 respondents, 6.4% reported that they had deferred collecting a  
36 prescription at least once during the preceding 12 months because they could not  
37 afford the cost of collecting the prescription. Younger adults aged 15-24, females,  
38 smokers, Māori and Pacific patients, and those with the lowest income status, were  
39 more likely not to obtain or buy prescription drugs because of cost barriers<sup>24</sup>.  
40 However, it is important to note that since September 2008 the co-payment for  
41 prescribed medicines have been decreased from 15 NZ\$ to 3NZ\$ for many people. It  
42 was acknowledged by the GPs in this study that the widening of the 3NZ\$ co-  
43 payment had improved access to medicines for patients, given the affordability of the  
44 lower fee structure.  
45  
46  
47  
48  
49

50 Sole supply and the perceived risk of drug shortages were raised as an issue by GPs in  
51 this research. Other problems with sole supply have previously been reported,  
52 including the poor quality of slow release morphine and a brand of felodipine with  
53 questionable pharmacokinetics and bioequivalence<sup>25</sup>. In addition, the flu vaccine  
54 chosen for sole supply in 2005 was under-strength in one of the three component flu  
55 strains, and another company had to step in to supply the vaccine<sup>25</sup>. However,  
56 PHARMAC reiterates that reference pricing and sole supply occurs only where it is  
57  
58  
59  
60



1  
2  
3 clear that a loss of choice between one equivalent brand of drug and another is not  
4 considered critical<sup>26</sup>. It has been suggested that it may be possible to manage some of  
5 the problems around sole supply through contingency and indemnity clauses in  
6 tendering contracts<sup>7</sup>.

8  
9 The GPs in this study also discussed many administrative barriers regarding accessing  
10 medicines, including Special Authority, restrictions on prescribing certain medicines  
11 and a fair amount of paper work. However, since the research was conducted many of  
12 these administrative issues may have been solved by instituting a system of electronic  
13 Special Authority application<sup>27, 28</sup>. In addition, whilst issues were evident regarding  
14 Special Authority applications, it should be noted that, only a small proportion of  
15 people are taking medicines that require a Special Authority in order to access the  
16 subsidy for a specified medicine (for example it was found that less than 1% of  
17 patients require statin through special authority<sup>29, 30</sup>). Furthermore, many restrictions  
18 to medicines have clinical dimensions, and are not simply in place because of issues  
19 related to cost containment. For example, prior to March 2009, isotretinoin  
20 (Roaccutane®) was only available on “specialist only prescription medicines”<sup>31</sup>.  
21 Recently the specialist prescribing requirement was removed, however the decision  
22 has been criticised by the New Zealand Dermatological Society stating that  
23 Isotretinoin is prone to misuse.<sup>32</sup> Moreover, these restrictions are not something  
24 which are specific to the New Zealand scenario, and are quite common in Canada<sup>35</sup>,  
25 Australia<sup>34, 41</sup>, and the United Kingdom<sup>35</sup>. Nevertheless, there remain issues around  
26 sole supply and administrative barriers regarding funding of medicines, which could  
27 be perhaps improved with better systems.  
28  
29  
30  
31  
32

33 Concerns were also raised by research participants regarding brand switching, and  
34 with respect to generics, which were viewed by some GPs as being of lower quality.  
35 Similar findings were observed in a New Zealand report which evaluated  
36 stakeholders’ views regarding generic substitution. The report found that although  
37 PHARMAC and pharmacists agreed with generic substitution, physicians and  
38 opposed the proposal for voluntary generic substitution citing concerns which  
39 included reduced patient compliance, patient confusion and quality and  
40 bioavailability<sup>36</sup>. However, on the one hand, research indicates that most generic  
41 medicines provide the same quality, safety, and efficacy as the original brand name  
42 product, and are typically 20-90% less expensive than the brand name original<sup>37</sup>.  
43 Whilst generic medicines are associated with large cost reductions, findings from a  
44 study evaluating consumer perceptions in Auckland suggest that older patients and  
45 patients with chronic conditions needed more information about generic medicines.  
46 Less than half of survey participants viewed generic medicines “to be as safe,  
47 effective and equivalent in quality” than branded medication<sup>38</sup>. In addition, in a  
48 PHARMAC discussion, it was noted while the term “generic” is well understood by  
49 PHARMAC, the public may simply regard them as “cheap”<sup>39</sup>. Moreover, it has been  
50 shown the physician views can strongly influence those of their patients<sup>38-39</sup>. With  
51 Medicines New Zealand, the New Zealand’s medicines policy promoting the use of  
52 generic drugs and stating that consideration must be given to ‘cost-effective treatment  
53 options’<sup>1</sup>, it is vital that apart from assuring the quality of generic medicines,  
54 programmes that educate prescribers and patient about brand switching are required.  
55  
56  
57  
58  
59  
60

1  
2  
3 The above mentioned is a key account of what GPs see as the advantages and  
4 disadvantages of the current system and how they balance these demands in practice.  
5 Though there are matters related to affordability of medicines and the decisions  
6 doctors face clinically and administratively, these issues are not specific to New  
7 Zealand. Doctors and general physicians all the over the world face similar issues  
8 related to cost containment and the clinical prescribing. For example, in a study of  
9 GPs in UK, it was found that almost all GPs believed that costs should be taken into  
10 account; however, conflict was observed regarding policy related to cost-containment  
11 and GPs' resistance to cost-cutting<sup>40</sup>. In Singapore, costs related to differential  
12 subsidies in the consultation fees and the availability of medicines at public  
13 polyclinics and GP clinics were key factors in influencing the family physicians'  
14 asthma drug treatment decisions<sup>41</sup>. Also, in a Canadian study, it was reported that  
15 'most physicians mentioned that drug reimbursement guidelines complicated their  
16 prescribing process and can require lengthy interpretation and advocacy for patients  
17 who require medication that is subject to reimbursement restrictions<sup>42</sup>.  
18  
19

### 20 21 22 23 **Limitations of the study**

24 All GPs were working in a large metropolitan city in New Zealand – it is not known  
25 whether their views and experiences differ from colleagues working and living in  
26 small towns and rural locales. Also, only 19 out of 150 were interested in  
27 participating so this could be another source of bias in the study.  
28

### 29 30 **CONCLUSION**

31 Whilst GPs in this study had some issues with the availability of certain drugs, they  
32 were generally satisfied with the access to medicines in New Zealand in primary care.  
33 The issues around sole supply, the use of generic medicines and the administrative  
34 barriers regarding funding of medicines could be improved with better systems. The  
35 work provides a solid account of what GPs see as the advantages and disadvantages  
36 of the current system and how they balance these demands in practice. Findings from  
37 this study will form an essential component of any future research which reviews  
38 New Zealand's current medicines policy.  
39

### 40 41 42 **Competing interest statement**

43 Piyush Grover was given a summer student scholarship by the University of Auckland to do initial  
44 work on the project. Lynne Bye and Rachael Butler worked as paid researcher from the grant received  
45 from New Zealand Pharmacy and Education and Research Foundation (NZPERF). Zaheer Babar and  
46 Janie Sheridan did not receive any personal funding or benefits from the grant. All authors have filled  
47 up competing interest forms ( and have declared competing interest, if there are any) and are available  
48 upon request.

### 49 50 **An exclusive licence**

51 "the Corresponding Author has the right to grant on behalf of all authors and does grant on behalf of all  
52 authors, an exclusive licence (or non exclusive for government employees) on a worldwide basis to the  
53 BMJ Publishing Group Ltd and its Licensees to permit this article (if accepted) to be published in BMJ  
54 editions and any other BMJ PGL products and sublicences to exploit all subsidiary rights, as set out in  
55 our licence.

### 56 57 **Authors' contribution**

58  
59  
60

1  
2  
3 ZB was the principal investigator and designed the study with the input from JS, LB, and PG. PG did  
4 the field study. PG and LB entered, checked and validated the data. The data was analysed by LB, PG,  
5 JS, ZB and RB. ZB and RB wrote the paper with significant contribution from JS. All authors  
6 participated in editing the article and approved the text for final submission.  
7

#### 8 **Funding**

9 The funding was received from University of Auckland and New Zealand Pharmacy and Education and  
10 Research Foundation (NZPERF), however funders have no role in the design, analysis, interpretation  
11 of the project as well as writing of the article.  
12

#### 13 **Data Sharing**

14 The original data is available from the principal author (ZB)  
15  
16  
17  
18  
19  
20  
21  
22  
23  
24  
25  
26  
27  
28  
29  
30  
31  
32  
33  
34  
35  
36  
37  
38  
39  
40  
41  
42  
43  
44  
45  
46  
47  
48  
49  
50  
51  
52  
53  
54  
55  
56  
57  
58  
59  
60

**Table 1: List of questions utilised in interviews with GPs**

|                                                                                                                                                                |                                                                                                                                |
|----------------------------------------------------------------------------------------------------------------------------------------------------------------|--------------------------------------------------------------------------------------------------------------------------------|
| <i>Domain 1 – General Practitioners’ perceptions regarding access to medicines and high cost drugs in New Zealand.</i>                                         |                                                                                                                                |
| A                                                                                                                                                              | What is your understanding of the “access to medicines” in New Zealand?                                                        |
| B                                                                                                                                                              | In your opinion what is the current state of access to medicines and high cost drugs in New Zealand and why?                   |
| C                                                                                                                                                              | If and how has this access changed in the past few years?                                                                      |
| D                                                                                                                                                              | What role do GPs play in determining the access to medicines in New Zealand?                                                   |
| E                                                                                                                                                              | How do you compare the access to medicines and high cost drugs in New Zealand with that of other developed countries?          |
| F                                                                                                                                                              | The current notion by drug industries is that access to medicines in New Zealand is inadequate. What is your opinion?          |
| G                                                                                                                                                              | Do you believe high costing medicines are readily accessible in New Zealand? Are there any examples you would like to mention? |
| H                                                                                                                                                              | Are there examples of medicines you would like to see being available in New Zealand?                                          |
| <i>Domain 2 - Views and perceptions regarding the role of Pharmac (Pharmaceutical Management Agency of New Zealand) to access of medicines in New Zealand.</i> |                                                                                                                                |
| A                                                                                                                                                              | What is your understanding of the role of Pharmac in New Zealand healthcare system?                                            |
| B                                                                                                                                                              | Do you think New Zealand needs an agency like Pharmac? Why?                                                                    |
| C                                                                                                                                                              | Pharmac has been under immense public scrutiny. Is it justified?                                                               |
| D                                                                                                                                                              | How successful has Pharmac been in achieving its aims?                                                                         |
| E                                                                                                                                                              | How does Pharmac influence the access to medicines for New Zealanders?                                                         |
| F                                                                                                                                                              | How do you find the decision making process undertaken by Pharmac?                                                             |
| G                                                                                                                                                              | Does Pharmac have sufficient representation from various health professionals and consumer groups?                             |
| H                                                                                                                                                              | What are your views on communication between Pharmac and GPs?                                                                  |

**Table 2: Overview of GP sample**

| N                                   | Number of participants (GPs) |
|-------------------------------------|------------------------------|
| <b>District Health Board (DHBs)</b> |                              |
| Auckland                            | 5                            |
| Counties Manukau                    | 10                           |
| Waitemata                           | 2                            |
| <b>Gender</b>                       |                              |
| Male                                | 13                           |
| Female                              | 4                            |
| <b>Age of participants (yrs)</b>    |                              |
| <40                                 | 4                            |
| 40 – 60                             | 10                           |
| 60 +                                | 3                            |
| <b>Experience (yrs)</b>             |                              |
| <10                                 | 3                            |
| 10 – 20                             | 4                            |
| 20 +                                | 10                           |

## REFERENCES

1. Associate Minister of Health - Ministry of Health. Medicines New Zealand: Contributing to good health outcomes for all New Zealanders. Wellington: Ministry of Health, 2007.
2. Morgan s, Hanley G, McMahon M, Barer M. Influencing Drug Prices through Formulary-Based Policies: Lessons from New Zealand. *Healthcare Policy* 2007;3(1):121-40.
3. PHARMAC . Pharmacist Information Sheet: The Introduction to PHARMAC, Wellington, New Zealand, 2010.
4. Pharmaceutical Management Agency of New Zealand. The truth about generic medicines. Pharmacist info sheet. Wellington: PHARMAC, 2010.
5. Pharmaceutical Management Agency of New Zealand. Making funding decisions: Pharmacist info sheet. Wellington: PHARMAC, 2008.
6. Pharmaceutical Management Agency. Pharmaceutical Schedule. In: Agency PM, editor. Wellington: PHARMAC, 2011.
7. Morgan S, Boothe K. Prescription drug subsidies in Australia and New Zealand *Australian Prescriber* 2010;33:2-4.
8. Glover J, Hetzel D, Tennant S. Australia and New Zealand, health systems of international encyclopedia of public health. Oxford: Academic Press: 2008:255-67.
9. Ryall T. Health Minister confirms new medicines spending, 30<sup>th</sup> July 2009 <http://www.scoop.co.nz/stories/PA0907/S00395.htm> (Accessed 30<sup>th</sup> Sep 2011)
10. Pharmaceutical Management Agency. Pharmaceutical Management Agency Annual Review. Wellington: PHARMAC, 2007.
11. Gregory W. PHARMAC: Getting the Best Bang for Your Buck Since 1993. Presentation at School of Pharmacy, University of Auckland. 2010.
12. Ministry of Health. Health and Independence Report. Ministry of Health: Wellington, 2003
13. Babar Z. Scientific inquiry and pharmaceutical policy: A preliminary analysis from New Zealand. *National Medicines Symposium*. Canberra, Australia, 2008.
14. Pfizer New Zealand (UMR Research Limited). A Quantitative Study of Clinicians' views on Pharmacist: UMR Research Ltd, 2005.
15. PHARMAC. Pharmacist Stakeholder Research, . Wellington: PHARMAC, 2007.
16. Cumming J, Mays N, Daubé J. How New Zealand has contained expenditure on drugs. *BMJ* 2010;340.
17. French S. A thorn in Pharmacist's side. <http://www.stuff.co.nz/national/herceptin-debate/569569>, 2008.
18. Research Medicines Industry Institute. Access to medicines slow and long. Wellington: Research Medicines Industry Institute, 2008
19. Sundakov A. Funding High Cost targeted Medicines: Improving the New Zealand Approach: Australia Wyeth Pharmaceutical Position Paper. Wellington: Wyeth Pharmaceutical, 2008.
20. Auckland City Council. Auckland Council, 2011. <http://www.aucklandcity.govt.nz/> ( Accessed 30<sup>th</sup> Sep 2011)
21. Ministry of Health. District Health Boards. Wellington: Ministry of Health, 2010.
22. DHBNZ. Pharmacy Procedures Manual, 2010.
23. PHARMAC. Pharmaceutical Management Agency of New Zealand, Pharmaceutical Schedule 2009. Wellington, New Zealand

- 1
- 2
- 3 24. Jatrana S, Crampton P, Norris P. Ethnic differences in access to prescription
- 4 medication because of cost in New Zealand. *Journal of Epidemiology and*
- 5 *Community Health* 2011;65(5):454-60.
- 6
- 7 25. MacKay P. Is PHARMAC's sole-supply tendering policy harming the health of
- 8 New Zealanders? *New Zealand Medical Journal* 2005;118 (1214 ).
- 9
- 10 26. Davies A, Metcalfe S, Moodie P, McNeen W. PHARMAC responds to Stewart
- 11 Mann on dihydropyridine calcium channel antagonists. *New Zealand Medical*
- 12 *Journal* 2005;118 (1220 ).
- 13
- 14 27. Ministry of Health. Sector Services. Claims, Provider Payments & Entitlements:
- 15 Special Authority. Wellington: Ministry of Health, 2008.
- 16
- 17 28. Pharmaceutical Management Agency. FAQ for GPs/Prescribers. Wellington:
- 18 PHARMAC, 2010.
- 19
- 20 29. Moodie P, Metcalfe S, McCormack P. Response from PHARMAC: difficult
- 21 choices. *New Zealand Medical Journal* 2003;116 (1170).
- 22
- 23 30. Pharmaceutical Management Agency. Difficult Choice. Wellington: PHARMAC,
- 24 2010
- 25
- 26 31. BPACNZ. Accessing funded medicines in New Zealand. *Best Practice Journal*
- 27 2009(21):43-45.
- 28
- 29 32. New Zealand Dermatological Society Incorporated. Dermatologists Warning Over
- 30 New Rules For Acne Drug - Media release December 20, 2008: New Zealand
- 31 Dermatological Society Incorporated, 2008.
- 32
- 33 33. Ministry of Health British Columbia. What is Special Authority . British
- 34 Columbia: Ministry of Health British Columbia,
- 35 <http://www.health.gov.bc.ca/pharmacare/sa/saindex.html> (Accessed 28/9/211)
- 36
- 37 34. Australian Government Department of Health and Ageing. Prescribing Medicines
- 38 – Information for PBS Prescribers. Canberra: Australian Government
- 39 Department of Health and Ageing, 2011.
- 40 <http://www.medicareaustralia.gov.au/provider/pbs/prescriber/index.jsp>
- 41
- 42 35. Prescribing restrictions placed on UK GPs. *PharmacoEconomics & Outcomes*
- 43 *News* 2011;627:2.
- 44
- 45 36. New Zealand Medicines and Medical Devices Safety Authority (Medsafe).
- 46 information for healthprofessionals. Regulatory issues. No immediate change to
- 47 generic. Wellington: Medsafe. [http://www.medsafe.govt.nz/profs/riss/gensubleg.](http://www.medsafe.govt.nz/profs/riss/gensubleg.asp#No)
- 48 [asp#No](http://www.medsafe.govt.nz/profs/riss/gensubleg.asp#No). Accessed 17 July 2011
- 49
- 50 37. European GenericMedicines Association. Generic medicines, basic notions.
- 51 Brussels: European GenericMedicines Association, 2002.
- 52
- 53 38. Babar Z-U-D, Stewart J, Reddy S, Alzaher W, Vareed P, Yacoub N, et al. An
- 54 evaluation of consumers' knowledge, perceptions and attitudes regarding
- 55 generic medicines in Auckland. *Pharmacy World & Science*
- 56 2010;32(4):440-48.
- 57
- 58 39. PHARMAC Consumer Advisory Committee. Minutes of the PHARMAC
- 59 Consumer Advisory Committee (CAC) meeting: Friday 13 July 2007.
- 60 Wellington: PHARMAC, 2007.
- 61
- 62 40. Prosser H, Walley T. A qualitative study of GPs'and PCO stakeholders' views on
- 63 the importance and influence of cost on prescribing. *Soc Sci Med.* 2005 Mar;
- 64 60(6):1335-46.(1)
- 65
- 66 41. Tan N C, Tay I H, Ngoh A, Tan M. Factors influencing family physicians' drug
- 67 prescribing behaviour in asthma management in primary care. *Singapore Med J* 2009;
- 68 50 (3) : 312 (2)
- 69
- 70

1  
2  
3  
4 42. Suggs L Suzanne, Raina P, Gafni A, Grant S, Skilton K, Fan A, Meneok KS.  
5 Family Physician attitudes about prescribing using a drug formulary. BMC Family  
6 Practice 2009, 10:69 doi:10.1186/1471-2296-10-69  
7  
8  
9  
10  
11  
12  
13  
14  
15  
16  
17  
18  
19  
20  
21  
22  
23  
24  
25  
26  
27  
28  
29  
30  
31  
32  
33  
34  
35  
36  
37  
38  
39  
40  
41  
42  
43  
44  
45  
46  
47  
48  
49  
50  
51  
52  
53  
54  
55  
56  
57  
58  
59  
60



## Consolidated criteria for reporting qualitative studies (COREQ): 32-item checklist

Developed from:

Tong A, Sainsbury P, Craig J. Consolidated criteria for reporting qualitative research (COREQ): a 32-item checklist for interviews and focus groups. *International Journal for Quality in Health Care*. 2007. Volume 19, Number 6: pp. 349 – 357

**YOU MUST PROVIDE A RESPONSE FOR ALL ITEMS. ENTER N/A IF NOT APPLICABLE**

| No. Item                                       | Guide questions/description                                                                                                               | Reported on Page #                                                                                            |
|------------------------------------------------|-------------------------------------------------------------------------------------------------------------------------------------------|---------------------------------------------------------------------------------------------------------------|
| <b>Domain 1: Research team and reflexivity</b> |                                                                                                                                           |                                                                                                               |
| <i>Personal Characteristics</i>                |                                                                                                                                           |                                                                                                               |
| 1. Interviewer/facilitator                     | Which author/s conducted the interview or focus group?                                                                                    | Piyush Grover                                                                                                 |
| 2. Credentials                                 | What were the researcher's credentials?<br>E.g. PhD, MD                                                                                   | One was a Bachelor of Pharmacy final year student<br><br>Two researchers having PhD<br>While two have Masters |
| 3. Occupation                                  | What was their occupation at the time of the study?                                                                                       | Student<br>Lecturers<br>Researchers                                                                           |
| 4. Gender                                      | Was the researcher male or female?                                                                                                        | Male                                                                                                          |
| 5. Experience and training                     | What experience or training did the researcher have?                                                                                      | Formal Qualitative NVivo training                                                                             |
| <i>Relationship with participants</i>          |                                                                                                                                           |                                                                                                               |
| 6. Relationship established                    | Was a relationship established prior to study commencement?                                                                               | No special relationship<br>Just introduced                                                                    |
| 7. Participant knowledge of the interviewer    | What did the participants know about the researcher? e.g. personal goals, reasons for doing the research                                  | Participant Information Sheet and the Study Guide describes the process and reasons for doing this research   |
| 8. Interviewer characteristics                 | What characteristics were reported about the interviewer/facilitator? e.g. Bias, assumptions, reasons and interests in the research topic | No specific bias was reported                                                                                 |
| <b>Domain 2: study design</b>                  |                                                                                                                                           |                                                                                                               |

|                                          |                                                                                                                                                          |                                                          |
|------------------------------------------|----------------------------------------------------------------------------------------------------------------------------------------------------------|----------------------------------------------------------|
| <i>Theoretical framework</i>             |                                                                                                                                                          |                                                          |
| 9. Methodological orientation and Theory | What methodological orientation was stated to underpin the study? e.g. grounded theory, discourse analysis, ethnography, phenomenology, content analysis | Content analysis                                         |
| <i>Participant selection</i>             |                                                                                                                                                          |                                                          |
| 10. Sampling                             | How were participants selected? e.g. purposive, convenience, consecutive, snowball                                                                       | Probability sampling                                     |
| 11. Method of approach                   | How were participants approached? e.g. face-to-face, telephone, mail, email                                                                              | mail                                                     |
| 12. Sample size                          | How many participants were in the study?                                                                                                                 | 17                                                       |
| 13. Non-participation                    | How many people refused to participate or dropped out? Reasons?                                                                                          | 2 were refused as data saturation was reached            |
| <i>Setting</i>                           |                                                                                                                                                          |                                                          |
| 14. Setting of data collection           | Where was the data collected? e.g. home, clinic, workplace                                                                                               | Clinic/workplace                                         |
| 15. Presence of non-participants         | Was anyone else present besides the participants and researchers?                                                                                        | No                                                       |
| 16. Description of sample                | What are the important characteristics of the sample? e.g. demographic data, date                                                                        | GPs within the greater Auckland region; November 2008    |
| <i>Data collection</i>                   |                                                                                                                                                          |                                                          |
| 17. Interview guide                      | Were questions, prompts, guides provided by the authors? Was it pilot tested?                                                                            | Yes<br>Yes                                               |
| 18. Repeat interviews                    | Were repeat inter views carried out? If yes, how many?                                                                                                   | No                                                       |
| 19. Audio/visual recording               | Did the research use audio or visual recording to collect the data?                                                                                      | Yes – interviews were recorded with consent              |
| 20. Field notes                          | Were field notes made during and/or after the inter view or focus group?                                                                                 | Yes                                                      |
| 21. Duration                             | What was the duration of the inter views or focus group?                                                                                                 | 40 minutes                                               |
| 22. Data saturation                      | Was data saturation discussed?                                                                                                                           | Yes                                                      |
| 23. Transcripts returned                 | Were transcripts returned to participants for comment and/or correction?                                                                                 | No but was checked within the research team for accuracy |
| <b>Domain 3: analysis and findings</b>   |                                                                                                                                                          |                                                          |
| <i>Data analysis</i>                     |                                                                                                                                                          |                                                          |
| 24. Number of data coders                | How many data coders coded the data?                                                                                                                     | 2                                                        |
| 25. Description of the coding tree       | Did authors provide a description of the coding tree?                                                                                                    | Yes                                                      |
| 26. Derivation of themes                 | Were themes identified in advance or derived from the data?                                                                                              | Derived from the data                                    |

|                                  |                                                                                                                                 |       |
|----------------------------------|---------------------------------------------------------------------------------------------------------------------------------|-------|
| 27. Software                     | What software, if applicable, was used to manage the data?                                                                      | NVivo |
| 28. Participant checking         | Did participants provide feedback on the findings?                                                                              | No    |
| <i>Reporting</i>                 |                                                                                                                                 |       |
| 29. Quotations presented         | Were participant quotations presented to illustrate the themes/findings? Was each quotation identified? e.g. participant number | Yes   |
| 30. Data and findings consistent | Was there consistency between the data presented and the findings?                                                              | Yes   |
| 31. Clarity of major themes      | Were major themes clearly presented in the findings?                                                                            | Yes   |
| 32. Clarity of minor themes      | Is there a description of diverse cases or discussion of minor themes?                                                          | Yes   |

Once you have completed this checklist, please save a copy and upload it as part of your submission. When requested to do so as part of the upload process, please select the file type: *Checklist*. You will NOT be able to proceed with submission unless the checklist has been uploaded. Please DO NOT include this checklist as part of the main manuscript document. It must be uploaded as a separate file.
